# Supplementary material for: Utility of the new cobas HCV test for viral load monitoring during direct-acting antiviral therapy
Source: PLoS One. 2019 Nov 18;14(11):e0224751. doi: 10.1371/journal.pone.0224751 (PMC6860929; doi:10.1371/journal.pone.0224751)
Supplement: S1 File — (XLSX) [file pone.0224751.s008.xlsx]

## Sheet: Roche_HCV_382_RING_IFN_FreeTher
GT	C68_RS_H	C68_TSTC	CAP_RS_D	CAP_TSTC	TP_Z	RELAPSER	REGIMEN	DURATION_WEEKS	CIRRHOSIS	NAIVE
GT1	9.73e+005 IU/ml	FRA	1000000	FRA	00: Baseline	0	3D	12	no	no
GT1	3.41e+001 IU/ml	FRA	7.5	FRA	02: Week 2	0	3D	12	no	no
GT1	Target Not Detected	FRA	7.5	FRA	04: Week 4	0	3D	12	no	no
GT1	Target Not Detected	FRA	0	FRA	12: Week 12	0	3D	12	no	no
GT1	Target Not Detected	FRA	0	FRA	28: FU W12	0	3D	12	no	no
GT3	3.05e+007 IU/ml	FRA	60800000	FRA	00: Baseline	0	DCV/SOF	12	no	no
GT3	4.19e+002 IU/ml	FRA	1040	FRA	01: Week 1	0	DCV/SOF	12	no	no
GT3	1.29e+002 IU/ml	FRA	177	FRA	02: Week 2	0	DCV/SOF	12	no	no
GT3	4.16e+001 IU/ml	FRA	59	FRA	04: Week 4	0	DCV/SOF	12	no	no
GT3	Target Not Detected	FRA	0	FRA	12: Week 12	0	DCV/SOF	12	no	no
GT3	Target Not Detected	FRA	0	FRA	28: FU W12	0	DCV/SOF	12	no	no
GT1	9.90e+006 IU/ml	FRA	6180000	FRA	00: Baseline	0	3D	12	no	no
GT1	6.40e+001 IU/ml	FRA	88	FRA	02: Week 2	0	3D	12	no	no
GT1	< Titer min	FRA	0	FRA	04: Week 4	0	3D	12	no	no
GT1	Target Not Detected	FRA	0	FRA	12: Week 12	0	3D	12	no	no
GT1	Target Not Detected	FRA	0	FRA	28: FU W12	0	3D	12	no	no
GT3	2.63e+005 IU/ml	FRA	161050	FRA	00: Baseline	0	SOF/RBV	24	no	no
GT3	< Titer min	FRA	0	FRA	03: Week 3	0	SOF/RBV	24	no	no
GT3	Target Not Detected	FRA	0	FRA	08: Week 8	0	SOF/RBV	24	no	no
GT3	Target Not Detected	FRA	0	FRA	14: Week 14	0	SOF/RBV	24	no	no
GT3	Target Not Detected	FRA	0	FRA	25: Week 25	0	SOF/RBV	24	no	no
GT3	Target Not Detected	FRA	0	FRA	28: FU W12	0	SOF/RBV	12	no	no
GT1	3.07e+006 IU/ml	FRA	1520000	FRA	00: Baseline	0	3D+RBV	12	yes	no
GT1	Target Not Detected	FRA	0	FRA	04: Week 4	0	3D+RBV	12	yes	no
GT1	Target Not Detected	FRA	0	FRA	12: Week 12	0	3D+RBV	12	yes	no
GT1	Target Not Detected	FRA	0	FRA	28: FU W12	0	3D+RBV	12	yes	no
GT3	4.45e+004 IU/ml	FRA	27900	FRA	00: Baseline	0	SOF/RBV	24	yes	yes
GT3	4.49e+001 IU/ml	FRA	74	FRA	02: Week 2	0	SOF/RBV	24	yes	yes
GT3	< Titer min	FRA	498	FRA	04: Week 4	0	SOF/RBV	24	yes	yes
GT3	Target Not Detected	FRA	7.5	FRA	06: Week 6	0	SOF/RBV	24	yes	yes
GT1	5.64e+006 IU/ml	FRA	3350000	FRA	00: Baseline	0	LDV/SOF	12	no	yes
GT1	1.32e+002 IU/ml	FRA	226	FRA	02: Week 2	0	LDV/SOF	12	no	yes
GT1	1.78e+001 IU/ml	FRA	38	FRA	04: Week 4	0	LDV/SOF	12	no	yes
GT1	Target Not Detected	FRA	0	FRA	12: Week 12	0	LDV/SOF	12	no	yes
GT1	Target Not Detected	FRA	0	FRA	28: FU W12	0	LDV/SOF	12	no	yes
GT3	2.31e+006 IU/ml	FRA	1870000	FRA	00: Baseline	0	DCV/SOF+RBV	24	no	no
GT3	4.44e+001 IU/ml	FRA	56	FRA	02: Week 2	0	DCV/SOF+RBV	24	no	no
GT3	< Titer min	FRA	7.5	FRA	04: Week 4	0	DCV/SOF+RBV	24	no	no
GT3	Target Not Detected	FRA	0	FRA	20: Week 20	0	DCV/SOF+RBV	24	no	no
GT3	Target Not Detected	FRA	0	FRA	28: FU W12	0	DCV/SOF+RBV	24	no	no
GT1	6.66e+005 IU/ml	FRA	920000	FRA	00: Baseline	0	LDV/SOF	8	no	yes
GT1	2.72e+002 IU/ml	FRA	394	FRA	01: Week 1	0	LDV/SOF	8	no	yes
GT1	1.61e+001 IU/ml	FRA	0	FRA	04: Week 4	0	LDV/SOF	8	no	yes
GT1	Target Not Detected	FRA	0	FRA	28: FU W12	0	LDV/SOF	8	no	yes
GT3	1.21e+006 IU/ml	FRA	689000	FRA	00: Baseline	0	DCV/SOF+RBV	24	no	no
GT3	7.64e+001 IU/ml	FRA	180	FRA	02: Week 2	0	DCV/SOF+RBV	24	no	no
GT3	< Titer min	FRA	7.5	FRA	04: Week 4	0	DCV/SOF+RBV	24	no	no
GT3	Target Not Detected	FRA	0	FRA	28: FU W12	0	DCV/SOF+RBV	24	no	no
GT1	4.59e+005 IU/ml	FRA	590000	FRA	00: Baseline	0	LDV/SOF	8	no	yes
GT1	2.60e+001 IU/ml	FRA	63	FRA	01: Week 1	0	LDV/SOF	8	no	yes
GT1	Target Not Detected	FRA	0	FRA	04: Week 4	0	LDV/SOF	8	no	yes
GT1	Target Not Detected	FRA	0	FRA	08: Week 8	0	LDV/SOF	8	no	yes
GT1	Target Not Detected	FRA	0	FRA	28: FU W12	0	LDV/SOF	8	no	yes
GT3	8.73e+006 IU/ml	FRA	7990000	FRA	00: Baseline	0	DCV/SOF+RBV	24	no	no
GT3	5.03e+001 IU/ml	FRA	58	FRA	04: Week 4	0	DCV/SOF+RBV	24	no	no
GT3	< Titer min	FRA	0	FRA	08: Week 8	0	DCV/SOF+RBV	24	no	no
GT3	Target Not Detected	FRA	0	FRA	12: Week 12	0	DCV/SOF+RBV	24	no	no
GT3	Target Not Detected	FRA	0	FRA	24: Week 24	0	DCV/SOF+RBV	24	no	no
GT3	Target Not Detected	FRA	0	FRA	28: FU W12	0	DCV/SOF+RBV	24	no	no
GT1	6.99e+005 IU/ml	FRA	388000	FRA	00: Baseline	0	LDV/SOF	24	yes	no
GT1	< Titer min	FRA	0	FRA	02: Week 2	0	LDV/SOF	24	yes	no
GT1	Target Not Detected	FRA	0	FRA	04: Week 4	0	LDV/SOF	24	yes	no
GT3	2.55e+006 IU/ml	FRA	989000	FRA	00: Baseline	0	DCV/SOF+RBV	24	yes	yes
GT3	1.31e+002 IU/ml	FRA	236	FRA	01: Week 1	0	DCV/SOF+RBV	24	yes	yes
GT3	2.26e+001 IU/ml	FRA	20	FRA	02: Week 2	0	DCV/SOF+RBV	24	yes	yes
GT3	Target Not Detected	FRA	0	FRA	05: Week 5	0	DCV/SOF+RBV	24	yes	yes
GT3	Target Not Detected	FRA	0	FRA	24: Week 24	0	DCV/SOF+RBV	24	yes	yes
GT3	Target Not Detected	FRA	0	FRA	28: FU W12	0	DCV/SOF+RBV	24	yes	yes
GT1	1.06e+007 IU/ml	FRA	5920000	FRA	00: Baseline	0	LDV/SOF	12	no	no
GT1	2.45e+001 IU/ml	FRA	7.5	FRA	02: Week 2	0	LDV/SOF	12	no	no
GT1	Target Not Detected	FRA	0	FRA	04: Week 4	0	LDV/SOF	12	no	no
GT1	Target Not Detected	FRA	0	FRA	12: Week 12	0	LDV/SOF	12	no	no
GT1	Target Not Detected	FRA	0	FRA	32: FU W24	0	LDV/SOF	12	no	no
GT3	8.77e+006 IU/ml	FRA	5210000	FRA	00: Baseline	1	DCV/SOF+RBV	24	yes	no
GT3	Target Not Detected	FRA	0	FRA	04: Week 4	1	DCV/SOF+RBV	24	yes	no
GT3	Target Not Detected	FRA	0	FRA	24: Week 24	1	DCV/SOF+RBV	24	yes	no
GT3	6.88e+002 IU/ml	FRA	0	FRA	28: FU W12	1	DCV/SOF+RBV	24	yes	no
GT1	1.02e+007 IU/ml	FRA	10500000	FRA	00: Baseline	0	LDV/SOF	12	no	yes
GT1	9.21e+002 IU/ml	FRA	1030	FRA	01: Week 1	0	LDV/SOF	12	no	yes
GT1	1.52e+002 IU/ml	FRA	294	FRA	02: Week 2	0	LDV/SOF	12	no	yes
GT1	Target Not Detected	FRA	0	FRA	08: Week 8	0	LDV/SOF	12	no	yes
GT1	Target Not Detected	FRA	0	FRA	12: Week 12	0	LDV/SOF	12	no	yes
GT1	Target Not Detected	FRA	0	FRA	28: FU W12	0	LDV/SOF	12	no	yes
GT3	1.11e+005 IU/ml	FRA	136000	FRA	00: Baseline	1	DCV/SOF+RBV	24	yes	no
GT3	< Titer min	FRA	0	FRA	01: Week 1	1	DCV/SOF+RBV	24	yes	no
GT3	Target Not Detected	FRA	0	FRA	04: Week 4	1	DCV/SOF+RBV	24	yes	no
GT3	1.22e+005 IU/ml	FRA	109000	FRA	24: Week 24	1	DCV/SOF+RBV	24	yes	no
GT3	1.06e+004 IU/ml	FRA	7900	FRA	28: FU W12	1	DCV/SOF+RBV	24	yes	no
GT1	6.99e+005 IU/ml	FRA	576000	FRA	00: Baseline	0	LDV/SOF	8	no	yes
GT1	< Titer min	FRA	29	FRA	01: Week 1	0	LDV/SOF	8	no	yes
GT1	Target Not Detected	FRA	0	FRA	02: Week 2	0	LDV/SOF	8	no	yes
GT1	Target Not Detected	FRA	0	FRA	08: Week 8	0	LDV/SOF	8	no	yes
GT1	Target Not Detected	FRA	0	FRA	28: FU W12	0	LDV/SOF	8	no	yes
GT3	3.85e+006 IU/ml	FRA	2530000	FRA	00: Baseline	0	DCV/SOF+RBV	24	yes	yes
GT3	Target Not Detected	FRA	0	FRA	04: Week 4	0	DCV/SOF+RBV	24	yes	yes
GT3	Target Not Detected	FRA	0	FRA	20: Week 20	0	DCV/SOF+RBV	24	yes	yes
GT3	Target Not Detected	FRA	0	FRA	28: FU W12	0	DCV/SOF+RBV	24	yes	yes
GT1	5.16e+005 IU/ml	FRA	830000	FRA	00: Baseline	0	LDV/SOF	12	no	no
GT1	< Titer min	FRA	7.5	FRA	02: Week 2	0	LDV/SOF	12	no	no
GT1	Target Not Detected	FRA	0	FRA	12: Week 12	0	LDV/SOF	12	no	no
GT1	Target Not Detected	FRA	0	FRA	28: FU W12	0	LDV/SOF	12	no	no
GT3	9.55e+006 IU/ml	FRA	4450000	FRA	00: Baseline	0	DCV/SOF+RBV	24	yes	yes
GT3	Target Not Detected	FRA	7.5	FRA	04: Week 4	0	DCV/SOF+RBV	24	yes	yes
GT3	Target Not Detected	FRA	0	FRA	24: Week 24	0	DCV/SOF+RBV	24	yes	yes
GT3	Target Not Detected	FRA	0	FRA	28: FU W12	0	DCV/SOF+RBV	24	yes	yes
GT1	4.12e+006 IU/ml	FRA	3730000	FRA	00: Baseline	0	3D	12	no	no
GT1	5.87e+001 IU/ml	FRA	86	FRA	02: Week 2	0	3D	12	no	no
GT1	< Titer min	FRA	0	FRA	04: Week 4	0	3D	12	no	no
GT1	Target Not Detected	FRA	0	FRA	12: Week 12	0	3D	12	no	no
GT1	Target Not Detected	FRA	0	FRA	28: FU W12	0	3D	12	no	no
GT3	1.10e+007 IU/ml	FRA	17011793	FRA	00: Baseline	0	DCV/SOF	12	no	yes
GT3	1.24e+002 IU/ml	FRA	204	FRA	01: Week 1	0	DCV/SOF	12	no	yes
GT3	Target Not Detected	FRA	0	FRA	02: Week 2	0	DCV/SOF	12	no	yes
GT3	< Titer min	FRA	0	FRA	04: Week 4	0	DCV/SOF	12	no	yes
GT3	Target Not Detected	FRA	0	FRA	12: Week 12	0	DCV/SOF	12	no	yes
GT3	Target Not Detected	FRA	0	FRA	28: FU W12	0	DCV/SOF	12	no	yes
GT1	1.51e+007 IU/ml	FRA	10300000	FRA	00: Baseline	0	LDV/SOF	8	no	yes
GT1	4.62e+001 IU/ml	FRA	99	FRA	01: Week 1	0	LDV/SOF	8	no	yes
GT1	< Titer min	FRA	0	FRA	02: Week 2	0	LDV/SOF	8	no	yes
GT1	Target Not Detected	FRA	0	FRA	04: Week 4	0	LDV/SOF	8	no	yes
GT1	Target Not Detected	FRA	0	FRA	08: Week 8	0	LDV/SOF	8	no	yes
GT1	Target Not Detected	FRA	0	FRA	28: FU W12	0	LDV/SOF	8	no	yes
GT3	1.14e+004 IU/ml	FRA	9584	FRA	00: Baseline	0	DCV/SOF+RBV	24	yes	no
GT3	Target Not Detected	FRA	0	FRA	04: Week 4	0	DCV/SOF+RBV	24	yes	no
GT3	Target Not Detected	FRA	0	FRA	24: Week 24	0	DCV/SOF+RBV	24	yes	no
GT3	Target Not Detected	FRA	0	FRA	31: FU W19	0	DCV/SOF+RBV	24	yes	no
GT1	1.14e+006 IU/ml	FRA	847020	FRA	00: Baseline	0	LDV/SOF	8	no	yes
GT1	Target Not Detected	FRA	16	FRA	01: Week 1	0	LDV/SOF	8	no	yes
GT1	Target Not Detected	FRA	20	FRA	02: Week 2	0	LDV/SOF	8	no	yes
GT1	Target Not Detected	FRA	0	FRA	04: Week 4	0	LDV/SOF	8	no	yes
GT1	Target Not Detected	FRA	0	FRA	08: Week 8	0	LDV/SOF	8	no	yes
GT1	Target Not Detected	FRA	0	FRA	28: FU W12	0	LDV/SOF	8	no	yes
GT3	1.08e+007 IU/ml	FRA	6940000	FRA	00: Baseline	0	DCV/SOF+RBV	24	yes	no
GT3	1.65e+001 IU/ml	FRA	7.5	FRA	04: Week 4	0	DCV/SOF+RBV	24	yes	no
GT3	Target Not Detected	FRA	0	FRA	24: Week 24	0	DCV/SOF+RBV	24	yes	no
GT3	Target Not Detected	FRA	0	FRA	28: FU W12	0	DCV/SOF+RBV	24	yes	no
GT1	3.60e+006 IU/ml	FRA	3460000	FRA	00: Baseline	0	LDV/SOF	8	no	yes
GT1	Target Not Detected	FRA	0	FRA	04: Week 4	0	LDV/SOF	8	no	yes
GT1	Target Not Detected	FRA	0	FRA	08: Week 8	0	LDV/SOF	8	no	yes
GT1	Target Not Detected	FRA	0	FRA	28: FU W12	0	LDV/SOF	8	no	yes
GT3	1.85e+006 IU/ml	FRA	1310000	FRA	00: Baseline	0	DCV/SOF+RBV	24	yes	no
GT3	1.55e+002 IU/ml	FRA	197	FRA	01: Week 1	0	DCV/SOF+RBV	24	yes	no
GT3	Target Not Detected	FRA	0	FRA	04: Week 4	0	DCV/SOF+RBV	24	yes	no
GT3	Target Not Detected	FRA	0	FRA	12: Week 12	0	DCV/SOF+RBV	24	yes	no
GT3	Target Not Detected	FRA	0	FRA	28: FU W12	0	DCV/SOF+RBV	24	yes	no
GT1	2.09e+007 IU/ml	FRA	16300000	FRA	00: Baseline	0	LDV/SOF	8	no	yes
GT1	4.47e+002 IU/ml	FRA	545	FRA	01: Week 1	0	LDV/SOF	8	no	yes
GT1	4.22e+001 IU/ml	FRA	28	FRA	02: Week 2	0	LDV/SOF	8	no	yes
GT1	Target Not Detected	FRA	7.5	FRA	04: Week 4	0	LDV/SOF	8	no	yes
GT1	Target Not Detected	FRA	0	FRA	08: Week 8	0	LDV/SOF	8	no	yes
GT1	Target Not Detected	FRA	0	FRA	28: FU W12	0	LDV/SOF	8	no	yes
GT3	1.52e+006 IU/ml	FRA	693000	FRA	00: Baseline	0	DCV/SOF+RBV	12	yes	no
GT3	< Titer min	FRA	0	FRA	02: Week 2	0	DCV/SOF+RBV	12	yes	no
GT3	Target Not Detected	FRA	0	FRA	12: Week 12	0	DCV/SOF+RBV	12	yes	no
GT3	Target Not Detected	FRA	0	FRA	28: FU W12	0	DCV/SOF+RBV	12	yes	no
GT1	6.63e+006 IU/ml	FRA	4940000	FRA	00: Baseline	0	LDV/SOF	12	no	no
GT1	2.23e+002 IU/ml	FRA	338	FRA	02: Week 2	0	LDV/SOF	12	no	no
GT1	3.57e+001 IU/ml	FRA	34	FRA	04: Week 4	0	LDV/SOF	12	no	no
GT1	Target Not Detected	FRA	0	FRA	06: Week 6	0	LDV/SOF	12	no	no
GT1	Target Not Detected	FRA	0	FRA	12: Week 12	0	LDV/SOF	12	no	no
GT1	Target Not Detected	FRA	0	FRA	28: FU W12	0	LDV/SOF	12	no	no
GT3	9.71e+004 IU/ml	FRA	100000	FRA	00: Baseline	0	DCV/SOF+RBV	24	yes	yes
GT3	Target Not Detected	FRA	0	FRA	24: Week 24	0	DCV/SOF+RBV	24	yes	yes
GT3	Target Not Detected	FRA	0	FRA	28: FU W12	0	DCV/SOF+RBV	24	yes	yes
GT1	2.30e+006 IU/ml	FRA	2120000	FRA	00: Baseline	0	LDV/SOF	8	no	yes
GT1	1.09e+003 IU/ml	FRA	1280	FRA	02: Week 2	0	LDV/SOF	8	no	yes
GT1	7.06e+001 IU/ml	FRA	155	FRA	04: Week 4	0	LDV/SOF	8	no	yes
GT1	Target Not Detected	FRA	0	FRA	08: Week 8	0	LDV/SOF	8	no	yes
GT1	Target Not Detected	FRA	0	FRA	28: FU W12	0	LDV/SOF	8	no	yes
GT3	1.03e+006 IU/ml	FRA	812000	FRA	00: Baseline	0	DCV/SOF+RBV	24	yes	no
GT3	Target Not Detected	FRA	0	FRA	04: Week 4	0	DCV/SOF+RBV	24	yes	no
GT3	Target Not Detected	FRA	0	FRA	24: Week 24	0	DCV/SOF+RBV	24	yes	no
GT3	Target Not Detected	FRA	0	FRA	28: FU W12	0	DCV/SOF+RBV	24	yes	no
GT1	1.68e+002 IU/ml	FRA	3310000	FRA	00: Baseline	0	LDV/SOF	8	no	yes
GT1	< Titer min	FRA	7.5	FRA	04: Week 4	0	LDV/SOF	8	no	yes
GT1	Target Not Detected	FRA	0	FRA	08: Week 8	0	LDV/SOF	8	no	yes
GT1	Target Not Detected	FRA	0	FRA	28: FU W12	0	LDV/SOF	8	no	yes
GT3	6.28e+006 IU/ml	FRA	2680000	FRA	00: Baseline	0	LDV/SOF+RBV	24	yes	yes
GT3	6.81e+001 IU/ml	FRA	123	FRA	04: Week 4	0	LDV/SOF+RBV	24	yes	yes
GT3	Target Not Detected	FRA	0	FRA	24: Week 24	0	LDV/SOF+RBV	24	yes	yes
GT3	Target Not Detected	FRA	0	FRA	28: FU W12	0	LDV/SOF+RBV	24	yes	yes
GT1	2.51e+006 IU/ml	FRA	2770000	FRA	00: Baseline	0	LDV/SOF	12	no	no
GT1	2.31e+001 IU/ml	FRA	7.5	FRA	02: Week 2	0	LDV/SOF	12	no	no
GT1	Target Not Detected	FRA	0	FRA	04: Week 4	0	LDV/SOF	12	no	no
GT1	Target Not Detected	FRA	0	FRA	12: Week 12	0	LDV/SOF	12	no	no
GT1	Target Not Detected	FRA	0	FRA	28: FU W12	0	LDV/SOF	12	no	no
GT3	6.16e+006 IU/ml	FRA	4220000	FRA	00: Baseline	0	LDV/SOF+RBV	24	yes	no
GT3	Target Not Detected	FRA	0	FRA	04: Week 4	0	LDV/SOF+RBV	24	yes	no
GT3	Target Not Detected	FRA	0	FRA	24: Week 24	0	LDV/SOF+RBV	24	yes	no
GT3	Target Not Detected	FRA	0	FRA	28: FU W12	0	LDV/SOF+RBV	24	yes	no
GT1	3.06e+004 IU/ml	FRA	35900	FRA	00: Baseline	0	LDV/SOF	8	no	yes
GT1	Target Not Detected	FRA	0	FRA	02: Week 2	0	LDV/SOF	8	no	yes
GT1	Target Not Detected	FRA	0	FRA	04: Week 4	0	LDV/SOF	8	no	yes
GT1	Target Not Detected	FRA	0	FRA	08: Week 8	0	LDV/SOF	8	no	yes
GT1	Target Not Detected	FRA	0	FRA	28: FU W12	0	LDV/SOF	8	no	yes
GT3	8.13e+005 IU/ml	FRA	579000	FRA	00: Baseline	0	SOF+PEG/RBV	12	yes	no
GT3	7.91e+005 IU/ml	FRA	1210000	FRA	01: Week 1	0	SOF+PEG/RBV	12	yes	no
GT3	Target Not Detected	FRA	0	FRA	04: Week 4	0	SOF+PEG/RBV	12	yes	no
GT3	Target Not Detected	FRA	0	FRA	08: Week 8	0	SOF+PEG/RBV	12	yes	no
GT3	Target Not Detected	FRA	0	FRA	12: Week 12	0	SOF+PEG/RBV	12	yes	no
GT3	Target Not Detected	FRA	0	FRA	29: FU W14	0	SOF+PEG/RBV	12	yes	no
GT1	1.56e+005 IU/ml	FRA	124000	FRA	00: Baseline	0	LDV/SOF	8	no	yes
GT1	1.00e+002 IU/ml	FRA	129	FRA	01: Week 1	0	LDV/SOF	8	no	yes
GT1	< Titer min	FRA	0	FRA	02: Week 2	0	LDV/SOF	8	no	yes
GT1	Target Not Detected	FRA	0	FRA	04: Week 4	0	LDV/SOF	8	no	yes
GT1	Target Not Detected	FRA	0	FRA	08: Week 8	0	LDV/SOF	8	no	yes
GT1	Target Not Detected	FRA	0	FRA	28: FU W12	0	LDV/SOF	8	no	yes
GT3	6.51e+006 IU/ml	FRA	6850000	FRA	00: Baseline	0	SOF+PEG/RBV	12	no	yes
GT3	6.30e+001 IU/ml	FRA	54	FRA	01: Week 1	0	SOF+PEG/RBV	12	no	yes
GT3	< Titer min	FRA	0	FRA	02: Week 2	0	SOF+PEG/RBV	12	no	yes
GT3	Target Not Detected	FRA	0	FRA	04: Week 4	0	SOF+PEG/RBV	12	no	yes
GT3	Target Not Detected	FRA	0	FRA	12: Week 12	0	SOF+PEG/RBV	12	no	yes
GT3	Target Not Detected	FRA	0	FRA	28: FU W12	0	SOF+PEG/RBV	12	no	yes
GT1	7.29e+006 IU/ml	FRA	5870000	FRA	00: Baseline	0	3D	12	no	yes
GT1	Target Not Detected	FRA	7.5	FRA	04: Week 4	0	3D	12	no	yes
GT1	Target Not Detected	FRA	7.5	FRA	12: Week 12	0	3D	12	no	yes
GT1	Target Not Detected	FRA	0	FRA	28: FU W12	0	3D	12	no	yes
GT3	1.23e+006 IU/ml	FRA	541000	FRA	00: Baseline	0	DCV/SOF	12	no	yes
GT3	< Titer min	FRA	7.5	FRA	01: Week 1	0	DCV/SOF	12	no	yes
GT3	Target Not Detected	FRA	0	FRA	02: Week 2	0	DCV/SOF	12	no	yes
GT3	Target Not Detected	FRA	0	FRA	04: Week 4	0	DCV/SOF	12	no	yes
GT3	Target Not Detected	FRA	0	FRA	12: Week 12	0	DCV/SOF	12	no	yes
GT1	4.09e+006 IU/ml	FRA	3200000	FRA	00: Baseline	0	LDV/SOF	12	no	no
GT1	< Titer min	FRA	7.5	FRA	02: Week 2	0	LDV/SOF	12	no	no
GT1	Target Not Detected	FRA	0	FRA	06: Week 6	0	LDV/SOF	12	no	no
GT1	Target Not Detected	FRA	0	FRA	12: Week 12	0	LDV/SOF	12	no	no
GT1	Target Not Detected	FRA	0	FRA	28: FU W12	0	LDV/SOF	12	no	no
GT3	1.14e+006 IU/ml	FRA	605000	FRA	00: Baseline	0	SOF+PEG/RBV	12	no	yes
GT3	< Titer min	FRA	21	FRA	01: Week 1	0	SOF+PEG/RBV	12	no	yes
GT3	< Titer min	FRA	0	FRA	02: Week 2	0	SOF+PEG/RBV	12	no	yes
GT3	< Titer min	FRA	0	FRA	04: Week 4	0	SOF+PEG/RBV	12	no	yes
GT3	Target Not Detected	FRA	0	FRA	12: Week 12	0	SOF+PEG/RBV	12	no	yes
GT3	Target Not Detected	FRA	7.5	FRA	28: FU W12	0	SOF+PEG/RBV	12	no	yes
GT1	5.79e+006 IU/ml	FRA	4710000	FRA	00: Baseline	0	LDV/SOF	8	no	yes
GT1	7.31e+001 IU/ml	FRA	167	FRA	01: Week 1	0	LDV/SOF	8	no	yes
GT1	< Titer min	FRA	59	FRA	02: Week 2	0	LDV/SOF	8	no	yes
GT1	Target Not Detected	FRA	0	FRA	04: Week 4	0	LDV/SOF	8	no	yes
GT1	Target Not Detected	FRA	0	FRA	28: FU W12	0	LDV/SOF	8	no	yes
GT3	5.08e+005 IU/ml	FRA	486000	FRA	00: Baseline	0	SOF+PEG/RBV	12	no	yes
GT3	< Titer min	FRA	7.5	FRA	02: Week 2	0	SOF+PEG/RBV	12	no	yes
GT3	< Titer min	FRA	0	FRA	04: Week 4	0	SOF+PEG/RBV	12	no	yes
GT3	Target Not Detected	FRA	0	FRA	08: Week 8	0	SOF+PEG/RBV	12	no	yes
GT3	Target Not Detected	FRA	0	FRA	28: FU W12	0	SOF+PEG/RBV	12	no	yes
GT1	1.07e+006 IU/ml	FRA	692000	FRA	00: Baseline	0	LDV/SOF	12	no	no
GT1	2.18e+001 IU/ml	FRA	25	FRA	02: Week 2	0	LDV/SOF	12	no	no
GT1	Target Not Detected	FRA	0	FRA	04: Week 4	0	LDV/SOF	12	no	no
GT1	Target Not Detected	FRA	0	FRA	12: Week 12	0	LDV/SOF	12	no	no
GT1	Target Not Detected	FRA	0	FRA	28: FU W12	0	LDV/SOF	12	no	no
GT3	7.88e+004 IU/ml	FRA	104000	FRA	00: Baseline	0	SOF+PEG/RBV	12	no	no
GT3	Target Not Detected	FRA	7.5	FRA	01: Week 1	0	SOF+PEG/RBV	12	no	no
GT3	< Titer min	FRA	0	FRA	02: Week 2	0	SOF+PEG/RBV	12	no	no
GT3	Target Not Detected	FRA	0	FRA	04: Week 4	0	SOF+PEG/RBV	12	no	no
GT3	Target Not Detected	FRA	0	FRA	12: Week 12	0	SOF+PEG/RBV	12	no	no
GT3	Target Not Detected	FRA	0	FRA	28: FU W12	0	SOF+PEG/RBV	12	no	no
GT1	9.05e+006 IU/ml	FRA	7670000	FRA	00: Baseline	0	LDV/SOF	12	no	yes
GT1	1.64e+002 IU/ml	FRA	272	FRA	02: Week 2	0	LDV/SOF	12	no	yes
GT1	4.93e+001 IU/ml	FRA	7.5	FRA	04: Week 4	0	LDV/SOF	12	no	yes
GT1	< Titer min	FRA	0	FRA	08: Week 8	0	LDV/SOF	12	no	yes
GT1	Target Not Detected	FRA	0	FRA	12: Week 12	0	LDV/SOF	12	no	yes
GT1	Target Not Detected	FRA	0	FRA	28: FU W12	0	LDV/SOF	12	no	yes
GT3	4.48e+006 IU/ml	FRA	3510000	FRA	00: Baseline	0	SOF+PEG/RBV	12	no	no
GT3	7.76e+001 IU/ml	FRA	173	FRA	01: Week 1	0	SOF+PEG/RBV	12	no	no
GT3	< Titer min	FRA	7.5	FRA	02: Week 2	0	SOF+PEG/RBV	12	no	no
GT3	Target Not Detected	FRA	0	FRA	04: Week 4	0	SOF+PEG/RBV	12	no	no
GT3	Target Not Detected	FRA	0	FRA	12: Week 12	0	SOF+PEG/RBV	12	no	no
GT3	Target Not Detected	FRA	0	FRA	28: FU W12	0	SOF+PEG/RBV	12	no	no
GT1	2.07e+006 IU/ml	FRA	1570000	FRA	00: Baseline	0	LDV/SOF	12	yes	yes
GT1	2.93e+002 IU/ml	FRA	666	FRA	01: Week 1	0	LDV/SOF	12	yes	yes
GT1	2.11e+001 IU/ml	FRA	46	FRA	02: Week 2	0	LDV/SOF	12	yes	yes
GT1	Target Not Detected	FRA	7.5	FRA	04: Week 4	0	LDV/SOF	12	yes	yes
GT1	Target Not Detected	FRA	0	FRA	12: Week 12	0	LDV/SOF	12	yes	yes
GT1	Target Not Detected	FRA	0	FRA	28: FU W12	0	LDV/SOF	12	yes	yes
GT3	7.02e+006 IU/ml	FRA	4070000	FRA	00: Baseline	0	SOF+PEG/RBV	12	no	yes
GT3	4.43e+001 IU/ml	FRA	96	FRA	01: Week 1	0	SOF+PEG/RBV	12	no	yes
GT3	< Titer min	FRA	0	FRA	02: Week 2	0	SOF+PEG/RBV	12	no	yes
GT3	Target Not Detected	FRA	0	FRA	04: Week 4	0	SOF+PEG/RBV	12	no	yes
GT3	Target Not Detected	FRA	0	FRA	12: Week 12	0	SOF+PEG/RBV	12	no	yes
GT3	Target Not Detected	FRA	0	FRA	28: FU W12	0	SOF+PEG/RBV	12	no	yes
GT1	3.61e+005 IU/ml	FRA	265543	FRA	00: Baseline	0	LDV/SOF	12	yes	yes
GT1	4.68e+001 IU/ml	FRA	7.5	FRA	02: Week 2	0	LDV/SOF	12	yes	yes
GT1	< Titer min	FRA	0	FRA	04: Week 4	0	LDV/SOF	12	yes	yes
GT1	Target Not Detected	FRA	0	FRA	12: Week 12	0	LDV/SOF	12	yes	yes
GT1	Target Not Detected	FRA	0	FRA	28: FU W12	0	LDV/SOF	12	yes	yes
GT3	1.48e+006 IU/ml	FRA	1740000	FRA	00: Baseline	0	SOF+PEG/RBV	12	yes	no
GT3	< Titer min	FRA	27	FRA	01: Week 1	0	SOF+PEG/RBV	12	yes	no
GT3	Target Not Detected	FRA	77	FRA	02: Week 2	0	SOF+PEG/RBV	12	yes	no
GT3	Target Not Detected	FRA	0	FRA	04: Week 4	0	SOF+PEG/RBV	12	yes	no
GT3	Target Not Detected	FRA	0	FRA	12: Week 12	0	SOF+PEG/RBV	12	yes	no
GT3	Target Not Detected	FRA	0	FRA	28: FU W12	0	SOF+PEG/RBV	12	yes	no
GT1	5.52e+006 IU/ml	FRA	4040000	FRA	00: Baseline	0	LDV/SOF	12	no	yes
GT1	< Titer min	FRA	7.5	FRA	04: Week 4	0	LDV/SOF	12	no	yes
GT1	Target Not Detected	FRA	0	FRA	12: Week 12	0	LDV/SOF	12	no	yes
GT1	Target Not Detected	FRA	0	FRA	28: FU W12	0	LDV/SOF	12	no	yes
GT1	4.02e+006 IU/ml	FRA	2580000	FRA	00: Baseline	0	LDV/SOF	8	no	yes
GT1	< Titer min	FRA	0	FRA	04: Week 4	0	LDV/SOF	8	no	yes
GT1	Target Not Detected	FRA	0	FRA	08: Week 8	0	LDV/SOF	8	no	yes
GT1	3.60e+006 IU/ml	FRA	3250000	FRA	00: Baseline	0	LDV/SOF	12	no	no
GT1	2.65e+002 IU/ml	FRA	429	FRA	01: Week 1	0	LDV/SOF	12	no	no
GT1	< Titer min	FRA	0	FRA	04: Week 4	0	LDV/SOF	12	no	no
GT1	Target Not Detected	FRA	0	FRA	12: Week 12	0	LDV/SOF	12	no	no
GT1	Target Not Detected	FRA	0	FRA	28: FU W12	0	LDV/SOF	12	no	no
GT1	7.76e+005 IU/ml	FRA	641000	FRA	00: Baseline	0	LDV/SOF	12	yes	no
GT1	1.65e+001 IU/ml	FRA	7.5	FRA	02: Week 2	0	LDV/SOF	12	yes	no
GT1	Target Not Detected	FRA	7.5	FRA	04: Week 4	0	LDV/SOF	12	yes	no
GT1	Target Not Detected	FRA	0	FRA	12: Week 12	0	LDV/SOF	12	yes	no
GT1	Target Not Detected	FRA	0	FRA	28: FU W12	0	LDV/SOF	12	yes	no
GT1	1.94e+007 IU/ml	FRA	14900000	FRA	00: Baseline	0	3D	12	no	yes
GT1	1.62e+002 IU/ml	FRA	244	FRA	02: Week 2	0	3D	12	no	yes
GT1	3.02e+001 IU/ml	FRA	7.5	FRA	04: Week 4	0	3D	12	no	yes
GT1	Target Not Detected	FRA	0	FRA	12: Week 12	0	3D	12	no	yes
GT1	Target Not Detected	FRA	0	FRA	28: FU W12	0	3D	12	no	yes
GT3	3.15e+004 IU/ml	FRA	11100	FRA	00: Baseline	0	LDV/SOF	24	no	yes
GT3	< Titer min	FRA	0	FRA	02: Week 2	0	LDV/SOF	24	no	yes
GT3	Target Not Detected	FRA	0	FRA	28: FU W12	0	LDV/SOF	24	no	yes
GT1	7.83e+005 IU/ml	FRA	426000	FRA	00: Baseline	0	LDV/SOF	12	no	no
GT1	5.15e+001 IU/ml	FRA	60	FRA	02: Week 2	0	LDV/SOF	12	no	no
GT1	< Titer min	FRA	0	FRA	04: Week 4	0	LDV/SOF	12	no	no
GT1	Target Not Detected	FRA	0	FRA	07: Week 7	0	LDV/SOF	12	no	no
GT1	Target Not Detected	FRA	0	FRA	12: Week 12	0	LDV/SOF	12	no	no
GT1	Target Not Detected	FRA	0	FRA	28: FU W12	0	LDV/SOF	12	no	no
GT1	5.04e+006 IU/ml	FRA	10500000	FRA	00: Baseline	0	LDV/SOF	8	no	yes
GT1	8.75e+001 IU/ml	FRA	30	FRA	02: Week 2	0	LDV/SOF	8	no	yes
GT1	< Titer min	FRA	0	FRA	04: Week 4	0	LDV/SOF	8	no	yes
GT1	Target Not Detected	FRA	0	FRA	08: Week 8	0	LDV/SOF	8	no	yes
GT1	Target Not Detected	FRA	0	FRA	28: FU W12	0	LDV/SOF	8	no	yes
GT1	1.29e+007 IU/ml	FRA	8470000	FRA	00: Baseline	0	LDV/SOF	8	no	yes
GT1	< Titer min	FRA	7.5	FRA	02: Week 2	0	LDV/SOF	8	no	yes
GT1	< Titer min	FRA	0	FRA	03: Week 3	0	LDV/SOF	8	no	yes
GT1	Target Not Detected	FRA	0	FRA	08: Week 8	0	LDV/SOF	8	no	yes
GT1	Target Not Detected	FRA	0	FRA	32: FU W24	0	LDV/SOF	8	no	yes
GT1	1.16e+007 IU/ml	FRA	12000000	FRA	00: Baseline	0	LDV/SOF	12	no	yes
GT1	< Titer min	FRA	7.5	FRA	04: Week 4	0	LDV/SOF	12	no	yes
GT1	Target Not Detected	FRA	0	FRA	12: Week 12	0	LDV/SOF	12	no	yes
GT1	Target Not Detected	FRA	0	FRA	28: FU W12	0	LDV/SOF	12	no	yes
GT1	1.81e+006 IU/ml	FRA	963000	FRA	00: Baseline	0	LDV/SOF	12	yes	no
GT1	5.05e+001 IU/ml	FRA	47	FRA	02: Week 2	0	LDV/SOF	12	yes	no
GT1	< Titer min	FRA	7.5	FRA	04: Week 4	0	LDV/SOF	12	yes	no
GT1	Target Not Detected	FRA	0	FRA	06: Week 6	0	LDV/SOF	12	yes	no
GT1	Target Not Detected	FRA	0	FRA	12: Week 12	0	LDV/SOF	12	yes	no
GT1	Target Not Detected	FRA	0	FRA	28: FU W12	0	LDV/SOF	12	yes	no
GT1	8.98e+005 IU/ml	FRA	431000	FRA	00: Baseline	0	LDV/SOF	8	no	yes
GT1	2.02e+003 IU/ml	FRA	2210	FRA	01: Week 1	0	LDV/SOF	8	no	yes
GT1	< Titer min	FRA	48	FRA	02: Week 2	0	LDV/SOF	8	no	yes
GT1	Target Not Detected	FRA	0	FRA	04: Week 4	0	LDV/SOF	8	no	yes
GT1	Target Not Detected	FRA	0	FRA	08: Week 8	0	LDV/SOF	8	no	yes
GT1	Target Not Detected	FRA	0	FRA	28: FU W12	0	LDV/SOF	8	no	yes
GT1	2.66e+006 IU/ml	FRA	1510000	FRA	00: Baseline	0	LDV/SOF	12	no	no
GT1	1.67e+001 IU/ml	FRA	18	FRA	02: Week 2	0	LDV/SOF	12	no	no
GT1	< Titer min	FRA	7.5	FRA	04: Week 4	0	LDV/SOF	12	no	no
GT1	Target Not Detected	FRA	0	FRA	12: Week 12	0	LDV/SOF	12	no	no
GT1	Target Not Detected	FRA	0	FRA	28: FU W12	0	LDV/SOF	12	no	no
GT1	1.24e+006 IU/ml	FRA	1090000	FRA	00: Baseline	0	LDV/SOF	8	no	yes
GT1	< Titer min	FRA	0	FRA	02: Week 2	0	LDV/SOF	8	no	yes
GT1	Target Not Detected	FRA	0	FRA	08: Week 8	0	LDV/SOF	8	no	yes
GT1	Target Not Detected	FRA	0	FRA	28: FU W12	0	LDV/SOF	8	no	yes
GT1	3.07e+006 IU/ml	FRA	1300000	FRA	00: Baseline	0	3D	12	no	no
GT1	Target Not Detected	FRA	0	FRA	04: Week 4	0	3D	12	no	no
GT1	Target Not Detected	FRA	0	FRA	12: Week 12	0	3D	12	no	no
GT1	Target Not Detected	FRA	0	FRA	28: FU W12	0	3D	12	no	no
GT1	1.38e+006 IU/ml	FRA	1020000	FRA	00: Baseline	0	LDV/SOF	12	no	no
GT1	Target Not Detected	FRA	0	FRA	04: Week 4	0	LDV/SOF	12	no	no
GT1	Target Not Detected	FRA	0	FRA	12: Week 12	0	LDV/SOF	12	no	no
GT1	Target Not Detected	FRA	0	FRA	28: FU W12	0	LDV/SOF	12	no	no
GT1	2.73e+006 IU/ml	FRA	2310000	FRA	00: Baseline	0	3D	12	no	no
GT1	1.20e+002 IU/ml	FRA	160	FRA	01: Week 1	0	3D	12	no	no
GT1	< Titer min	FRA	0	FRA	04: Week 4	0	3D	12	no	no
GT1	Target Not Detected	FRA	0	FRA	12: Week 12	0	3D	12	no	no
GT1	Target Not Detected	FRA	0	FRA	28: FU W12	0	3D	12	no	no
GT3	6.60e+006 IU/ml	FRA	5290000	FRA	00: Baseline	0	LDV/SOF	24	no	no
GT3	Target Not Detected	FRA	0	FRA	12: Week 12	0	LDV/SOF	24	no	no
GT3	Target Not Detected	FRA	0	FRA	16: Week 16	0	LDV/SOF	24	no	no
GT3	Target Not Detected	FRA	0	FRA	20: Week 20	0	LDV/SOF	24	no	no
GT3	Target Not Detected	FRA	0	FRA	24: Week 24	0	LDV/SOF	24	no	no
GT3	Target Not Detected	FRA	0	FRA	29: FU W14	0	LDV/SOF	24	no	no
GT1	6.86e+005 IU/ml	FRA	696000	FRA	00: Baseline	0	LDV/SOF	12	no	no
GT1	Target Not Detected	FRA	0	FRA	04: Week 4	0	LDV/SOF	12	no	no
GT1	Target Not Detected	FRA	0	FRA	12: Week 12	0	LDV/SOF	12	no	no
GT1	Target Not Detected	FRA	0	FRA	28: FU W12	0	LDV/SOF	12	no	no
GT1	9.37e+004 IU/ml	FRA	82819	FRA	00: Baseline	0	LDV/SOF	12	no	no
GT1	< Titer min	FRA	7.5	FRA	02: Week 2	0	LDV/SOF	12	no	no
GT1	Target Not Detected	FRA	0	FRA	04: Week 4	0	LDV/SOF	12	no	no
GT1	Target Not Detected	FRA	0	FRA	06: Week 6	0	LDV/SOF	12	no	no
GT1	Target Not Detected	FRA	7.5	FRA	12: Week 12	0	LDV/SOF	12	no	no
GT1	Target Not Detected	FRA	0	FRA	28: FU W12	0	LDV/SOF	12	no	no
GT1	3.03e+005 IU/ml	FRA	194000	FRA	00: Baseline	0	LDV/SOF	12	no	no
GT1	< Titer min	FRA	7.5	FRA	02: Week 2	0	LDV/SOF	12	no	no
GT1	Target Not Detected	FRA	7.5	FRA	04: Week 4	0	LDV/SOF	12	no	no
GT1	Target Not Detected	FRA	0	FRA	12: Week 12	0	LDV/SOF	12	no	no
GT1	Target Not Detected	FRA	0	FRA	28: FU W12	0	LDV/SOF	12	no	no
GT1	2.77e+006 IU/ml	FRA	2900000	FRA	00: Baseline	0	LDV/SOF	12	no	yes
GT1	< Titer min	FRA	7.5	FRA	04: Week 4	0	LDV/SOF	12	no	yes
GT1	Target Not Detected	FRA	0	FRA	28: FU W12	0	LDV/SOF	12	no	yes
GT1	3.92e+006 IU/ml	FRA	2910000	FRA	00: Baseline	0	LDV/SOF	12	no	yes
GT1	< Titer min	FRA	7.5	FRA	04: Week 4	0	LDV/SOF	12	no	yes
GT1	Target Not Detected	FRA	0	FRA	28: FU W12	0	LDV/SOF	12	no	yes
GT1	2.36e+006 IU/ml	FRA	2171244	FRA	00: Baseline	0	LDV/SOF	8	no	yes
GT1	2.14e+001 IU/ml	FRA	7.5	FRA	04: Week 4	0	LDV/SOF	8	no	yes
GT1	Target Not Detected	FRA	0	FRA	08: Week 8	0	LDV/SOF	8	no	yes
GT1	Target Not Detected	FRA	0	FRA	28: FU W12	0	LDV/SOF	8	no	yes
GT1	1.00e+007 IU/ml	FRA	7140000	FRA	00: Baseline	0	LDV/SOF	12	no	no
GT1	< Titer min	FRA	7.5	FRA	04: Week 4	0	LDV/SOF	12	no	no
GT1	Target Not Detected	FRA	0	FRA	12: Week 12	0	LDV/SOF	12	no	no
GT1	Target Not Detected	FRA	0	FRA	30: FU W16	0	LDV/SOF	12	no	no
GT1	5.07e+006 IU/ml	FRA	4280000	FRA	00: Baseline	0	LDV/SOF	12	yes	no
GT1	Target Not Detected	FRA	0	FRA	06: Week 6	0	LDV/SOF	12	yes	no
GT1	Target Not Detected	FRA	0	FRA	12: Week 12	0	LDV/SOF	12	yes	no
GT1	Target Not Detected	FRA	0	FRA	28: FU W12	0	LDV/SOF	12	yes	no
GT1	4.68e+005 IU/ml	FRA	154000	FRA	00: Baseline	0	LDV/SOF	8	no	yes
GT1	< Titer min	FRA	19	FRA	04: Week 4	0	LDV/SOF	8	no	yes
GT1	Target Not Detected	FRA	0	FRA	08: Week 8	0	LDV/SOF	8	no	yes
GT1	8.71e+006 IU/ml	FRA	7910512	FRA	00: Baseline	0	LDV/SOF	12	no	no
GT1	4.84e+001 IU/ml	FRA	69	FRA	02: Week 2	0	LDV/SOF	12	no	no
GT1	Target Not Detected	FRA	0	FRA	07: Week 7	0	LDV/SOF	12	no	no
GT1	Target Not Detected	FRA	0	FRA	12: Week 12	0	LDV/SOF	12	no	no
GT1	Target Not Detected	FRA	0	FRA	28: FU W12	0	LDV/SOF	12	no	no
GT1	1.12e+006 IU/ml	FRA	2516023	FRA	00: Baseline	0	3D	12	no	yes
GT1	Target Not Detected	FRA	0	FRA	04: Week 4	0	3D	12	no	yes
GT1	Target Not Detected	FRA	0	FRA	12: Week 12	0	3D	12	no	yes
GT1	Target Not Detected	FRA	0	FRA	28: FU W12	0	3D	12	no	yes
GT3	3.62e+006 IU/ml	FRA	3970000	FRA	00: Baseline	0	LDV/SOF+RBV	12	yes	no
GT3	1.66e+001 IU/ml	FRA	7.5	FRA	04: Week 4	0	LDV/SOF+RBV	12	yes	no
GT3	Target Not Detected	FRA	0	FRA	12: Week 12	0	LDV/SOF+RBV	12	yes	no
GT3	< Titer min	FRA	0	FRA	28: FU W12	0	LDV/SOF+RBV	12	yes	no
GT1	5.69e+006 IU/ml	FRA	2080000	FRA	00: Baseline	0	LDV/SOF+RBV	12	no	no
GT1	< Titer min	FRA	0	FRA	04: Week 4	0	LDV/SOF+RBV	12	no	no
GT1	Target Not Detected	FRA	0	FRA	12: Week 12	0	LDV/SOF+RBV	12	no	no
GT1	Target Not Detected	FRA	0	FRA	28: FU W12	0	LDV/SOF+RBV	12	no	no
GT1	1.82e+006 IU/ml	FRA	1120000	FRA	00: Baseline	0	LDV/SOF	8	no	yes
GT1	< Titer min	FRA	7.5	FRA	04: Week 4	0	LDV/SOF	8	no	yes
GT1	Target Not Detected	FRA	0	FRA	08: Week 8	0	LDV/SOF	8	no	yes
GT1	Target Not Detected	FRA	0	FRA	28: FU W12	0	LDV/SOF	8	no	yes
GT1	1.63e+006 IU/ml	FRA	1400000	FRA	00: Baseline	0	LDV/SOF	8	no	yes
GT1	Target Not Detected	FRA	0	FRA	02: Week 2	0	LDV/SOF	8	no	yes
GT1	Target Not Detected	FRA	0	FRA	08: Week 8	0	LDV/SOF	8	no	yes
GT1	Target Not Detected	FRA	0	FRA	28: FU W12	0	LDV/SOF	8	no	yes
GT1	1.03e+006 IU/ml	FRA	665000	FRA	00: Baseline	0	LDV/SOF	12	no	no
GT1	3.52e+001 IU/ml	FRA	29	FRA	01: Week 1	0	LDV/SOF	12	no	no
GT1	Target Not Detected	FRA	23	FRA	02: Week 2	0	LDV/SOF	12	no	no
GT1	Target Not Detected	FRA	0	FRA	04: Week 4	0	LDV/SOF	12	no	no
GT1	Target Not Detected	FRA	0	FRA	12: Week 12	0	LDV/SOF	12	no	no
GT1	Target Not Detected	FRA	0	FRA	28: FU W12	0	LDV/SOF	12	no	no
GT1	7.93e+004 IU/ml	FRA	62700	FRA	00: Baseline	0	LDV/SOF	8	no	yes
GT1	Target Not Detected	FRA	0	FRA	04: Week 4	0	LDV/SOF	8	no	yes
GT1	Target Not Detected	FRA	0	FRA	08: Week 8	0	LDV/SOF	8	no	yes
GT1	Target Not Detected	FRA	0	FRA	28: FU W12	0	LDV/SOF	8	no	yes
GT1	5.05e+006 IU/ml	FRA	2680000	FRA	00: Baseline	0	LDV/SOF	8	no	yes
GT1	8.77e+001 IU/ml	FRA	181	FRA	02: Week 2	0	LDV/SOF	8	no	yes
GT1	< Titer min	FRA	0	FRA	04: Week 4	0	LDV/SOF	8	no	yes
GT1	Target Not Detected	FRA	7.5	FRA	08: Week 8	0	LDV/SOF	8	no	yes
GT1	Target Not Detected	FRA	0	FRA	28: FU W12	0	LDV/SOF	8	no	yes
GT1	9.45e+006 IU/ml	FRA	9240000	FRA	00: Baseline	0	LDV/SOF	12	no	no
GT1	8.76e+001 IU/ml	FRA	97	FRA	02: Week 2	0	LDV/SOF	12	no	no
GT1	< Titer min	FRA	7.5	FRA	04: Week 4	0	LDV/SOF	12	no	no
GT1	Target Not Detected	FRA	0	FRA	12: Week 12	0	LDV/SOF	12	no	no
GT1	Target Not Detected	FRA	0	FRA	28: FU W12	0	LDV/SOF	12	no	no
GT1	9.00e+006 IU/ml	FRA	7510000	FRA	00: Baseline	0	LDV/SOF	12	no	no
GT1	Target Not Detected	FRA	7.5	FRA	02: Week 2	0	LDV/SOF	12	no	no
GT1	Target Not Detected	FRA	0	FRA	04: Week 4	0	LDV/SOF	12	no	no
GT1	Target Not Detected	FRA	0	FRA	12: Week 12	0	LDV/SOF	12	no	no
GT1	Target Not Detected	FRA	0	FRA	28: FU W12	0	LDV/SOF	12	no	no
GT1	7.95e+006 IU/ml	FRA	5540000	FRA	00: Baseline	0	LDV/SOF	8	no	yes
GT1	2.56e+002 IU/ml	FRA	674	FRA	01: Week 1	0	LDV/SOF	8	no	yes
GT1	7.70e+001 IU/ml	FRA	176	FRA	02: Week 2	0	LDV/SOF	8	no	yes
GT1	Target Not Detected	FRA	0	FRA	04: Week 4	0	LDV/SOF	8	no	yes
GT1	Target Not Detected	FRA	0	FRA	08: Week 8	0	LDV/SOF	8	no	yes
GT1	Target Not Detected	FRA	0	FRA	28: FU W12	0	LDV/SOF	8	no	yes
GT1	4.42e+006 IU/ml	FRA	2580000	FRA	00: Baseline	0	LDV/SOF+RBV	12	yes	no
GT1	< Titer min	FRA	0	FRA	04: Week 4	0	LDV/SOF+RBV	12	yes	no
GT1	Target Not Detected	FRA	0	FRA	12: Week 12	0	LDV/SOF+RBV	12	yes	no
GT1	Target Not Detected	FRA	0	FRA	28: FU W12	0	LDV/SOF+RBV	12	yes	no
GT1	1.57e+006 IU/ml	FRA	2010000	FRA	00: Baseline	0	LDV/SOF	8	no	yes
GT1	Target Not Detected	FRA	0	FRA	04: Week 4	0	LDV/SOF	8	no	yes
GT1	Target Not Detected	FRA	0	FRA	08: Week 8	0	LDV/SOF	8	no	yes
GT1	Target Not Detected	FRA	0	FRA	27: FU W11	0	LDV/SOF	8	no	yes
GT3	4.96e+005 IU/ml	FRA	331000	FRA	00: Baseline	0	LDV/SOF	24	no	no
GT3	< Titer min	FRA	7.5	FRA	04: Week 4	0	LDV/SOF	24	no	no
GT3	Target Not Detected	FRA	0	FRA	20: Week 20	0	LDV/SOF	24	no	no
GT3	Target Not Detected	FRA	0	FRA	28: FU W12	0	LDV/SOF	24	no	no
GT1	4.98e+006 IU/ml	FRA	3340000	FRA	00: Baseline	0	LDV/SOF+RBV	12	yes	no
GT1	5.88e+001 IU/ml	FRA	101	FRA	02: Week 2	0	LDV/SOF+RBV	12	yes	no
GT1	2.17e+001 IU/ml	FRA	7.5	FRA	04: Week 4	0	LDV/SOF+RBV	12	yes	no
GT1	Target Not Detected	FRA	0	FRA	12: Week 12	0	LDV/SOF+RBV	12	yes	no
GT1	Target Not Detected	FRA	0	FRA	28: FU W12	0	LDV/SOF+RBV	12	yes	no
GT1	1.34e+006 IU/ml	FRA	1270000	FRA	00: Baseline	0	LDV/SOF	12	yes	no
GT1	Target Not Detected	FRA	7.5	FRA	04: Week 4	0	LDV/SOF	12	yes	no
GT1	Target Not Detected	FRA	0	FRA	12: Week 12	0	LDV/SOF	12	yes	no
GT1	Target Not Detected	FRA	0	FRA	30: FU W16	0	LDV/SOF	12	yes	no
GT1	2.28e+006 IU/ml	FRA	1420000	FRA	00: Baseline	0	LDV/SOF+RBV	12	no	no
GT1	Target Not Detected	FRA	0	FRA	04: Week 4	0	LDV/SOF+RBV	12	no	no
GT1	Target Not Detected	FRA	0	FRA	12: Week 12	0	LDV/SOF+RBV	12	no	no
GT1	Target Not Detected	FRA	0	FRA	28: FU W12	0	LDV/SOF+RBV	12	no	no
GT1	2.05e+006 IU/ml	FRA	2380000	FRA	00: Baseline	0	LDV/SOF+RBV	24	no	no
GT1	1.93e+002 IU/ml	FRA	321	FRA	02: Week 2	0	LDV/SOF+RBV	24	no	no
GT1	Target Not Detected	FRA	46	FRA	04: Week 4	0	LDV/SOF+RBV	24	no	no
GT1	Target Not Detected	FRA	0	FRA	28: FU W12	0	LDV/SOF+RBV	24	no	no
GT1	1.38e+005 IU/ml	FRA	134000	FRA	00: Baseline	0	LDV/SOF+RBV	12	yes	no
GT1	6.24e+001 IU/ml	FRA	42	FRA	01: Week 1	0	LDV/SOF+RBV	12	yes	no
GT1	< Titer min	FRA	7.5	FRA	02: Week 2	0	LDV/SOF+RBV	12	yes	no
GT1	< Titer min	FRA	0	FRA	04: Week 4	0	LDV/SOF+RBV	12	yes	no
GT1	Target Not Detected	FRA	0	FRA	12: Week 12	0	LDV/SOF+RBV	12	yes	no
GT1	Target Not Detected	FRA	0	FRA	28: FU W12	0	LDV/SOF+RBV	12	yes	no
GT1	2.85e+006 IU/ml	FRA	1360000	FRA	00: Baseline	0	LDV/SOF	12	yes	yes
GT1	2.54e+001 IU/ml	FRA	39	FRA	04: Week 4	0	LDV/SOF	12	yes	yes
GT1	Target Not Detected	FRA	0	FRA	12: Week 12	0	LDV/SOF	12	yes	yes
GT1	Target Not Detected	FRA	0	FRA	28: FU W12	0	LDV/SOF	12	yes	yes
GT1	5.20e+005 IU/ml	FRA	723000	FRA	00: Baseline	0	LDV/SOF	12	yes	no
GT1	Target Not Detected	FRA	0	FRA	04: Week 4	0	LDV/SOF	12	yes	no
GT1	Target Not Detected	FRA	0	FRA	12: Week 12	0	LDV/SOF	12	yes	no
GT1	Target Not Detected	FRA	0	FRA	28: FU W12	0	LDV/SOF	12	yes	no
GT1	4.45e+006 IU/ml	FRA	2900000	FRA	00: Baseline	0	LDV/SOF+RBV	12	yes	no
GT1	7.54e+002 IU/ml	FRA	956	FRA	01: Week 1	0	LDV/SOF+RBV	12	yes	no
GT1	3.73e+001 IU/ml	FRA	37	FRA	04: Week 4	0	LDV/SOF+RBV	12	yes	no
GT1	Target Not Detected	FRA	0	FRA	12: Week 12	0	LDV/SOF+RBV	12	yes	no
GT1	Target Not Detected	FRA	0	FRA	28: FU W12	0	LDV/SOF+RBV	12	yes	no
GT1	2.66e+006 IU/ml	FRA	2680000	FRA	00: Baseline	0	LDV/SOF+RBV	8	no	yes
GT1	Target Not Detected	FRA	0	FRA	04: Week 4	0	LDV/SOF+RBV	8	no	yes
GT1	Target Not Detected	FRA	0	FRA	08: Week 8	0	LDV/SOF+RBV	8	no	yes
GT1	Target Not Detected	FRA	0	FRA	28: FU W12	0	LDV/SOF+RBV	8	no	yes
GT1	2.90e+006 IU/ml	FRA	2610000	FRA	00: Baseline	0	LDV/SOF+RBV	12	yes	no
GT1	2.83e+003 IU/ml	FRA	4720	FRA	01: Week 1	0	LDV/SOF+RBV	12	yes	no
GT1	Target Not Detected	FRA	0	FRA	12: Week 12	0	LDV/SOF+RBV	12	yes	no
GT1	Target Not Detected	FRA	0	FRA	28: FU W12	0	LDV/SOF+RBV	12	yes	no
GT1	2.28e+006 IU/ml	FRA	1970000	FRA	00: Baseline	0	3D	12	yes	yes
GT1	2.45e+001 IU/ml	FRA	23	FRA	04: Week 4	0	3D	12	yes	yes
GT1	Target Not Detected	FRA	0	FRA	12: Week 12	0	3D	12	yes	yes
GT1	Target Not Detected	FRA	0	FRA	28: FU W12	0	3D	12	yes	yes
GT3	6.05e+004 IU/ml	FRA	44256	FRA	00: Baseline	0	SOF+RBV	24	yes	no
GT3	1.85e+001 IU/ml	FRA	52	FRA	05: Week 5	0	SOF+RBV	24	yes	no
GT3	Target Not Detected	FRA	0	FRA	08: Week 8	0	SOF+RBV	24	yes	no
GT3	Target Not Detected	FRA	0	FRA	24: Week 24	0	SOF+RBV	24	yes	no
GT3	Target Not Detected	FRA	0	FRA	28: FU W12	0	SOF+RBV	24	yes	no
GT1	5.97e+006 IU/ml	FRA	5470000	FRA	00: Baseline	0	LDV/SOF+RBV	12	yes	no
GT1	9.20e+002 IU/ml	FRA	1170	FRA	01: Week 1	0	LDV/SOF+RBV	12	yes	no
GT1	1.57e+002 IU/ml	FRA	323	FRA	02: Week 2	0	LDV/SOF+RBV	12	yes	no
GT1	Target Not Detected	FRA	7.5	FRA	04: Week 4	0	LDV/SOF+RBV	12	yes	no
GT1	Target Not Detected	FRA	0	FRA	12: Week 12	0	LDV/SOF+RBV	12	yes	no
GT1	Target Not Detected	FRA	0	FRA	28: FU W12	0	LDV/SOF+RBV	12	yes	no
GT1	6.27e+006 IU/ml	FRA	6580000	FRA	00: Baseline	0	LDV/SOF+RBV	24	yes	no
GT1	2.01e+002 IU/ml	FRA	447	FRA	02: Week 2	0	LDV/SOF+RBV	24	yes	no
GT1	2.80e+001 IU/ml	FRA	59	FRA	04: Week 4	0	LDV/SOF+RBV	24	yes	no
GT1	< Titer min	FRA	0	FRA	24: Week 24	0	LDV/SOF+RBV	24	yes	no
GT1	1.56e+006 IU/ml	FRA	1220462	FRA	00: Baseline	0	LDV/SOF+RBV	12	yes	no
GT1	3.78e+001 IU/ml	FRA	48	FRA	02: Week 2	0	LDV/SOF+RBV	12	yes	no
GT1	Target Not Detected	FRA	0	FRA	04: Week 4	0	LDV/SOF+RBV	12	yes	no
GT1	Target Not Detected	FRA	0	FRA	12: Week 12	0	LDV/SOF+RBV	12	yes	no
GT1	Target Not Detected	FRA	0	FRA	28: FU W12	0	LDV/SOF+RBV	12	yes	no
GT1	1.42e+006 IU/ml	FRA	820000	FRA	00: Baseline	0	LDV/SOF+RBV	12	yes	no
GT1	2.25e+002 IU/ml	FRA	331	FRA	01: Week 1	0	LDV/SOF+RBV	12	yes	no
GT1	9.64e+001 IU/ml	FRA	94	FRA	02: Week 2	0	LDV/SOF+RBV	12	yes	no
GT1	Target Not Detected	FRA	19	FRA	04: Week 4	0	LDV/SOF+RBV	12	yes	no
GT1	Target Not Detected	FRA	0	FRA	12: Week 12	0	LDV/SOF+RBV	12	yes	no
GT1	Target Not Detected	FRA	0	FRA	28: FU W12	0	LDV/SOF+RBV	12	yes	no
GT1	1.16e+006 IU/ml	FRA	770000	FRA	00: Baseline	0	LDV/SOF+RBV	12	yes	yes
GT1	2.79e+001 IU/ml	FRA	21	FRA	02: Week 2	0	LDV/SOF+RBV	12	yes	yes
GT1	Target Not Detected	FRA	0	FRA	04: Week 4	0	LDV/SOF+RBV	12	yes	yes
GT1	Target Not Detected	FRA	0	FRA	12: Week 12	0	LDV/SOF+RBV	12	yes	yes
GT1	Target Not Detected	FRA	0	FRA	28: FU W12	0	LDV/SOF+RBV	12	yes	yes
GT1	6.69e+006 IU/ml	FRA	2300000	FRA	00: Baseline	0	LDV/SOF+RBV	12	yes	yes
GT1	Target Not Detected	FRA	7.5	FRA	03: Week 3	0	LDV/SOF+RBV	12	yes	yes
GT1	Target Not Detected	FRA	0	FRA	04: Week 4	0	LDV/SOF+RBV	12	yes	yes
GT1	Target Not Detected	FRA	0	FRA	12: Week 12	0	LDV/SOF+RBV	12	yes	yes
GT1	Target Not Detected	FRA	0	FRA	28: FU W12	0	LDV/SOF+RBV	12	yes	yes
GT1	2.30e+006 IU/ml	FRA	1980000	FRA	00: Baseline	0	LDV/SOF+RBV	12	yes	yes
GT1	< Titer min	FRA	0	FRA	02: Week 2	0	LDV/SOF+RBV	12	yes	yes
GT1	Target Not Detected	FRA	0	FRA	04: Week 4	0	LDV/SOF+RBV	12	yes	yes
GT1	Target Not Detected	FRA	0	FRA	06: Week 6	0	LDV/SOF+RBV	12	yes	yes
GT1	Target Not Detected	FRA	0	FRA	12: Week 12	0	LDV/SOF+RBV	12	yes	yes
GT1	Target Not Detected	FRA	0	FRA	28: FU W12	0	LDV/SOF+RBV	12	yes	yes
GT1	1.16e+006 IU/ml	FRA	872198	FRA	00: Baseline	0	LDV/SOF+RBV	12	yes	no
GT1	3.41e+001 IU/ml	FRA	16	FRA	04: Week 4	0	LDV/SOF+RBV	12	yes	no
GT1	Target Not Detected	FRA	0	FRA	06: Week 6	0	LDV/SOF+RBV	12	yes	no
GT1	Target Not Detected	FRA	0	FRA	12: Week 12	0	LDV/SOF+RBV	12	yes	no
GT1	Target Not Detected	FRA	0	FRA	28: FU W12	0	LDV/SOF+RBV	12	yes	no
GT1	2.26e+006 IU/ml	FRA	1210000	FRA	00: Baseline	0	LDV/SOF+RBV	12	no	yes
GT1	4.14e+001 IU/ml	FRA	78	FRA	02: Week 2	0	LDV/SOF+RBV	12	no	yes
GT1	Target Not Detected	FRA	0	FRA	04: Week 4	0	LDV/SOF+RBV	12	no	yes
GT1	Target Not Detected	FRA	0	FRA	12: Week 12	0	LDV/SOF+RBV	12	no	yes
GT1	Target Not Detected	FRA	0	FRA	28: FU W12	0	LDV/SOF+RBV	12	no	yes
GT1	2.59e+005 IU/ml	FRA	271849	FRA	00: Baseline	0	LDV/SOF+RBV	12	yes	no
GT1	3.06e+002 IU/ml	FRA	534	FRA	02: Week 2	0	LDV/SOF+RBV	12	yes	no
GT1	5.22e+001 IU/ml	FRA	103	FRA	04: Week 4	0	LDV/SOF+RBV	12	yes	no
GT1	< Titer min	FRA	0	FRA	06: Week 6	0	LDV/SOF+RBV	12	yes	no
GT1	Target Not Detected	FRA	0	FRA	12: Week 12	0	LDV/SOF+RBV	12	yes	no
GT1	Target Not Detected	FRA	0	FRA	28: FU W12	0	LDV/SOF+RBV	12	yes	no
GT1	1.01e+007 IU/ml	FRA	11100000	FRA	00: Baseline	0	3D+RBV	12	no	yes
GT1	< Titer min	FRA	7.5	FRA	04: Week 4	0	3D+RBV	12	no	yes
GT1	Target Not Detected	FRA	0	FRA	12: Week 12	0	3D+RBV	12	no	yes
GT1	Target Not Detected	FRA	0	FRA	28: FU W12	0	3D+RBV	12	no	yes
GT3	3.37e+006 IU/ml	FRA	2960000	FRA	00: Baseline	0	SOF+RBV	24	no	no
GT3	< Titer min	FRA	0	FRA	04: Week 4	0	SOF+RBV	24	no	no
GT3	Target Not Detected	FRA	0	FRA	24: Week 24	0	SOF+RBV	24	no	no
GT3	Target Not Detected	FRA	0	FRA	28: FU W12	0	SOF+RBV	24	no	no
GT1	7.49e+005 IU/ml	FRA	639000	FRA	00: Baseline	0	LDV/SOF+RBV	24	no	no
GT1	< Titer min	FRA	7.5	FRA	04: Week 4	0	LDV/SOF+RBV	24	no	no
GT1	Target Not Detected	FRA	0	FRA	24: Week 24	0	LDV/SOF+RBV	24	no	no
GT1	Target Not Detected	FRA	0	FRA	28: FU W12	0	LDV/SOF+RBV	24	no	no
1b	4.38e+005 IU/ml	HAN	500000	HAN	00: Baseline	0	Abb 3D / RBV	12	1	1
1b	Target Not Detected	HAN	17	HAN	04: Week 4	0	Abb 3D / RBV	12	1	1
1b	Target Not Detected	HAN	0	HAN	08: Week 8	0	Abb 3D / RBV	12	1	1
1b	Target Not Detected	HAN	0	HAN	12: Week 12	0	Abb 3D / RBV	12	1	1
1b	Target Not Detected	HAN	0	HAN	28: FU W12	0	Abb 3D / RBV	12	1	1
1a	2.10e+006 IU/ml	HAN	2600000	HAN	00: Baseline	0	SOF / LDV	8	0	1
1a	8.32e+002 IU/ml	HAN	2000	HAN	01: Week 1	0	SOF / LDV	8	0	1
1a	1.76e+001 IU/ml	HAN	19	HAN	04: Week 4	0	SOF / LDV	8	0	1
1a	Target Not Detected	HAN	0	HAN	08: Week 8	0	SOF / LDV	8	0	1
1a	Target Not Detected	HAN	0	HAN	28: FU W12	0	SOF / LDV	8	0	1
1a	7.25e+006 IU/ml	HAN	2900000	HAN	00: Baseline	0	SOF / LDV	24	1	0
1a	2.70e+001 IU/ml	HAN	20	HAN	04: Week 4	0	SOF / LDV	24	1	0
1a	Target Not Detected	HAN	0	HAN	08: Week 8	0	SOF / LDV	24	1	0
1a	Target Not Detected	HAN	0	HAN	12: Week 12	0	SOF / LDV	24	1	0
1a	Target Not Detected	HAN	0	HAN	16: Week 16	0	SOF / LDV	24	1	0
1a	Target Not Detected	HAN	0	HAN	20: Week 20	0	SOF / LDV	24	1	0
1a	Target Not Detected	HAN	0	HAN	24: Week 24	0	SOF / LDV	24	1	0
1a	Target Not Detected	HAN	0	HAN	28: FU W12	0	SOF / LDV	24	1	0
1a	7.88e+006 IU/ml	HAN	6200000	HAN	00: Baseline	0	SOF / DAC / RBV	24	1	0
1a	2.95e+002 IU/ml	HAN	370	HAN	02: Week 2	0	SOF / DAC / RBV	24	1	0
1a	2.82e+001 IU/ml	HAN	23	HAN	04: Week 4	0	SOF / DAC / RBV	24	1	0
1a	Target Not Detected	HAN	0	HAN	08: Week 8	0	SOF / DAC / RBV	24	1	0
1a	Target Not Detected	HAN	0	HAN	12: Week 12	0	SOF / DAC / RBV	24	1	0
1a	Target Not Detected	HAN	0	HAN	16: Week 16	0	SOF / DAC / RBV	24	1	0
1a	Target Not Detected	HAN	0	HAN	20: Week 20	0	SOF / DAC / RBV	24	1	0
1a	Target Not Detected	HAN	0	HAN	24: Week 24	0	SOF / DAC / RBV	24	1	0
1a	Target Not Detected	HAN	0	HAN	28: FU W12	0	SOF / DAC / RBV	24	1	0
1a	8.44e+006 IU/ml	HAN	6900000	HAN	00: Baseline	0	SOF / LDV	12	0	0
1a	Target Not Detected	HAN	25	HAN	02: Week 2	0	SOF / LDV	12	0	0
1a	< Titer min	HAN	25	HAN	04: Week 4	0	SOF / LDV	12	0	0
1a	Target Not Detected	HAN	0	HAN	08: Week 8	0	SOF / LDV	12	0	0
1a	Target Not Detected	HAN	0	HAN	12: Week 12	0	SOF / LDV	12	0	0
1a	Target Not Detected	HAN	0	HAN	28: FU W12	0	SOF / LDV	12	0	0
1a	1.15e+007 IU/ml	HAN	7400000	HAN	00: Baseline	0	RBV / SOF / LDV	12	1	0
1a	3.94e+001 IU/ml	HAN	45	HAN	04: Week 4	0	RBV / SOF / LDV	12	1	0
1a	Target Not Detected	HAN	0	HAN	08: Week 8	0	RBV / SOF / LDV	12	1	0
1a	Target Not Detected	HAN	0	HAN	12: Week 12	0	RBV / SOF / LDV	12	1	0
1a	Target Not Detected	HAN	0	HAN	28: FU W12	0	RBV / SOF / LDV	12	1	0
1a	1.43e+006 IU/ml	HAN	770000	HAN	00: Baseline	0	SOF / DAC	24	1	0
1a	4.29e+002 IU/ml	HAN	480	HAN	01: Week 1	0	SOF / DAC	24	1	0
1a	3.54e+002 IU/ml	HAN	250	HAN	02: Week 2	0	SOF / DAC	24	1	0
1a	4.37e+001 IU/ml	HAN	50	HAN	04: Week 4	0	SOF / DAC	24	1	0
1a	Target Not Detected	HAN	7.5	HAN	08: Week 8	0	SOF / DAC	24	1	0
1a	Target Not Detected	HAN	0	HAN	12: Week 12	0	SOF / DAC	24	1	0
1a	Target Not Detected	HAN	0	HAN	16: Week 16	0	SOF / DAC	24	1	0
1a	Target Not Detected	HAN	0	HAN	20: Week 20	0	SOF / DAC	24	1	0
1a	Target Not Detected	HAN	0	HAN	24: Week 24	0	SOF / DAC	24	1	0
1a	Target Not Detected	HAN	0	HAN	28: FU W12	0	SOF / DAC	24	1	0
1b	1.28e+003 IU/ml	HAN	1500	HAN	02: Week 2	0	SOF / DAC	24	1	0
1b	1.37e+002 IU/ml	HAN	160	HAN	04: Week 4	0	SOF / DAC	24	1	0
1b	Target Not Detected	HAN	0	HAN	08: Week 8	0	SOF / DAC	24	1	0
1b	Target Not Detected	HAN	0	HAN	12: Week 12	0	SOF / DAC	24	1	0
1b	Target Not Detected	HAN	0	HAN	16: Week 16	0	SOF / DAC	24	1	0
1b	Target Not Detected	HAN	0	HAN	20: Week 20	0	SOF / DAC	24	1	0
1b	Target Not Detected	HAN	0	HAN	24: Week 24	0	SOF / DAC	24	1	0
1b	Target Not Detected	HAN	0	HAN	28: FU W12	0	SOF / DAC	24	1	0
1a	5.24e+006 IU/ml	HAN	2500000	HAN	00: Baseline	0	SOF / DAC / RBV	24	0	0
1a	1.07e+003 IU/ml	HAN	1200	HAN	02: Week 2	0	SOF / DAC / RBV	24	0	0
1a	1.18e+002 IU/ml	HAN	180	HAN	04: Week 4	0	SOF / DAC / RBV	24	0	0
1a	< Titer min	HAN	7.5	HAN	08: Week 8	0	SOF / DAC / RBV	24	0	0
1a	Target Not Detected	HAN	0	HAN	12: Week 12	0	SOF / DAC / RBV	24	0	0
1a	Target Not Detected	HAN	0	HAN	16: Week 16	0	SOF / DAC / RBV	24	0	0
1a	Target Not Detected	HAN	0	HAN	20: Week 20	0	SOF / DAC / RBV	24	0	0
1a	Target Not Detected	HAN	0	HAN	24: Week 24	0	SOF / DAC / RBV	24	0	0
1a	Target Not Detected	HAN	0	HAN	28: FU W12	0	SOF / DAC / RBV	24	0	0
1a	2.73e+006 IU/ml	HAN	1700000	HAN	00: Baseline	0	SOF / DAC	24	1	0
1a	9.03e+001 IU/ml	HAN	410	HAN	02: Week 2	0	SOF / DAC	24	1	0
1a	2.81e+001 IU/ml	HAN	7.5	HAN	04: Week 4	0	SOF / DAC	24	1	0
1a	Target Not Detected	HAN	0	HAN	08: Week 8	0	SOF / DAC	24	1	0
1a	Target Not Detected	HAN	0	HAN	12: Week 12	0	SOF / DAC	24	1	0
1a	Target Not Detected	HAN	0	HAN	16: Week 16	0	SOF / DAC	24	1	0
1a	Target Not Detected	HAN	0	HAN	20: Week 20	0	SOF / DAC	24	1	0
1a	Target Not Detected	HAN	0	HAN	24: Week 24	0	SOF / DAC	24	1	0
1a	Target Not Detected	HAN	0	HAN	28: FU W12	0	SOF / DAC	24	1	0
1b	3.43e+006 IU/ml	HAN	2000000	HAN	00: Baseline	0	SOF / DCV	24	1	0
1b	1.22e+002 IU/ml	HAN	70	HAN	02: Week 2	0	SOF / DCV	24	1	0
1b	< Titer min	HAN	7.5	HAN	04: Week 4	0	SOF / DCV	24	1	0
1b	Target Not Detected	HAN	0	HAN	08: Week 8	0	SOF / DCV	24	1	0
1b	Target Not Detected	HAN	0	HAN	12: Week 12	0	SOF / DCV	24	1	0
1b	Target Not Detected	HAN	0	HAN	16: Week 16	0	SOF / DCV	24	1	0
1b	Target Not Detected	HAN	0	HAN	20: Week 20	0	SOF / DCV	24	1	0
1b	Target Not Detected	HAN	0	HAN	24: Week 24	0	SOF / DCV	24	1	0
1b	Target Not Detected	HAN	0	HAN	28: FU W12	0	SOF / DCV	24	1	0
1a	1.80e+006 IU/ml	HAN	680000	HAN	00: Baseline	0	SOF / DCV	24	1	0
1a	5.05e+002 IU/ml	HAN	550	HAN	01: Week 1	0	SOF / DCV	24	1	0
1a	6.44e+001 IU/ml	HAN	17	HAN	02: Week 2	0	SOF / DCV	24	1	0
1a	< Titer min	HAN	7.5	HAN	04: Week 4	0	SOF / DCV	24	1	0
1a	Target Not Detected	HAN	0	HAN	08: Week 8	0	SOF / DCV	24	1	0
1a	Target Not Detected	HAN	0	HAN	12: Week 12	0	SOF / DCV	24	1	0
1a	Target Not Detected	HAN	0	HAN	16: Week 16	0	SOF / DCV	24	1	0
1a	Target Not Detected	HAN	0	HAN	20: Week 20	0	SOF / DCV	24	1	0
1a	Target Not Detected	HAN	0	HAN	24: Week 24	0	SOF / DCV	24	1	0
1a	Target Not Detected	HAN	0	HAN	28: FU W12	0	SOF / DCV	24	1	0
1b	1.21e+007 IU/ml	HAN	6000000	HAN	00: Baseline	0	SOF / DCV	12	1	0
1b	1.69e+003 IU/ml	HAN	1800	HAN	01: Week 1	0	SOF / DCV	12	1	0
1b	2.59e+002 IU/ml	HAN	300	HAN	02: Week 2	0	SOF / DCV	12	1	0
1b	2.20e+001 IU/ml	HAN	7.5	HAN	04: Week 4	0	SOF / DCV	12	1	0
1b	Target Not Detected	HAN	0	HAN	08: Week 8	0	SOF / DCV	12	1	0
1b	Target Not Detected	HAN	0	HAN	12: Week 12	0	SOF / DCV	12	1	0
1b	Target Not Detected	HAN	0	HAN	28: FU W12	0	SOF / DCV	12	1	0
1b	7.54e+005 IU/ml	HAN	430000	HAN	00: Baseline	0	SOF / DAC	24	1	0
1b	3.50e+001 IU/ml	HAN	44	HAN	01: Week 1	0	SOF / DAC	24	1	0
1b	1.69e+001 IU/ml	HAN	7.5	HAN	02: Week 2	0	SOF / DAC	24	1	0
1b	Target Not Detected	HAN	7.5	HAN	04: Week 4	0	SOF / DAC	24	1	0
1b	Target Not Detected	HAN	0	HAN	08: Week 8	0	SOF / DAC	24	1	0
1b	Target Not Detected	HAN	0	HAN	12: Week 12	0	SOF / DAC	24	1	0
1b	Target Not Detected	HAN	0	HAN	16: Week 16	0	SOF / DAC	24	1	0
1b	Target Not Detected	HAN	0	HAN	20: Week 20	0	SOF / DAC	24	1	0
1b	Target Not Detected	HAN	0	HAN	24: Week 24	0	SOF / DAC	24	1	0
1b	Target Not Detected	HAN	0	HAN	28: FU W12	0	SOF / DAC	24	1	0
1a	3.30e+006 IU/ml	HAN	1600000	HAN	00: Baseline	0	SOF / DAC	24	1	0
1a	2.35e+001 IU/ml	HAN	7.5	HAN	02: Week 2	0	SOF / DAC	24	1	0
1a	Target Not Detected	HAN	7.5	HAN	04: Week 4	0	SOF / DAC	24	1	0
1a	2.61e+001 IU/ml	HAN	7.5	HAN	08: Week 8	0	SOF / DAC	24	1	0
1a	Target Not Detected	HAN	0	HAN	12: Week 12	0	SOF / DAC	24	1	0
1a	Target Not Detected	HAN	0	HAN	16: Week 16	0	SOF / DAC	24	1	0
1a	Target Not Detected	HAN	0	HAN	20: Week 20	0	SOF / DAC	24	1	0
1a	Target Not Detected	HAN	0	HAN	24: Week 24	0	SOF / DAC	24	1	0
1a	Target Not Detected	HAN	0	HAN	28: FU W12	0	SOF / DAC	24	1	0
1a	9.73e+005 IU/ml	HAN	330000	HAN	00: Baseline	0	SOF / DAC	24	1	0
1a	Target Not Detected	HAN	7.5	HAN	02: Week 2	0	SOF / DAC	24	1	0
1a	Target Not Detected	HAN	7.5	HAN	04: Week 4	0	SOF / DAC	24	1	0
1a	Target Not Detected	HAN	0	HAN	08: Week 8	0	SOF / DAC	24	1	0
1a	Target Not Detected	HAN	0	HAN	12: Week 12	0	SOF / DAC	24	1	0
1a	Target Not Detected	HAN	0	HAN	16: Week 16	0	SOF / DAC	24	1	0
1a	Target Not Detected	HAN	0	HAN	20: Week 20	0	SOF / DAC	24	1	0
1a	Target Not Detected	HAN	0	HAN	24: Week 24	0	SOF / DAC	24	1	0
1a	Target Not Detected	HAN	0	HAN	28: FU W12	0	SOF / DAC	24	1	0
1b	3.12e+006 IU/ml	HAN	1600000	HAN	00: Baseline	0	SOF / DAC	24	1	0
1b	9.33e+001 IU/ml	HAN	52	HAN	02: Week 2	0	SOF / DAC	24	1	0
1b	1.61e+001 IU/ml	HAN	7.5	HAN	04: Week 4	0	SOF / DAC	24	1	0
1b	Target Not Detected	HAN	0	HAN	08: Week 8	0	SOF / DAC	24	1	0
1b	Target Not Detected	HAN	0	HAN	12: Week 12	0	SOF / DAC	24	1	0
1b	Target Not Detected	HAN	0	HAN	16: Week 16	0	SOF / DAC	24	1	0
1b	Target Not Detected	HAN	0	HAN	20: Week 20	0	SOF / DAC	24	1	0
1b	< Titer min	HAN	0	HAN	28: FU W12	0	SOF / DAC	24	1	0
1b	9.25e+005 IU/ml	HAN	220000	HAN	00: Baseline	0	SOF / DAC	24	1	0
1b	< Titer min	HAN	7.5	HAN	04: Week 4	0	SOF / DAC	24	1	0
1b	Target Not Detected	HAN	7.5	HAN	08: Week 8	0	SOF / DAC	24	1	0
1b	Target Not Detected	HAN	0	HAN	12: Week 12	0	SOF / DAC	24	1	0
1b	Target Not Detected	HAN	0	HAN	16: Week 16	0	SOF / DAC	24	1	0
1b	Target Not Detected	HAN	0	HAN	20: Week 20	0	SOF / DAC	24	1	0
1b	Target Not Detected	HAN	0	HAN	24: Week 24	0	SOF / DAC	24	1	0
1b	Target Not Detected	HAN	0	HAN	28: FU W12	0	SOF / DAC	24	1	0
1b	2.68e+006 IU/ml	HAN	1600000	HAN	00: Baseline	0	RBV / SOF / LDV	12	1	0
1b	2.46e+001 IU/ml	HAN	7.5	HAN	04: Week 4	0	RBV / SOF / LDV	12	1	0
1b	Target Not Detected	HAN	0	HAN	08: Week 8	0	RBV / SOF / LDV	12	1	0
1b	Target Not Detected	HAN	0	HAN	12: Week 12	0	RBV / SOF / LDV	12	1	0
1b	Target Not Detected	HAN	0	HAN	28: FU W12	0	RBV / SOF / LDV	12	1	0
1a	7.33e+006 IU/ml	HAN	5300000	HAN	00: Baseline	0	SOF / LDV	8	0	1
1a	2.28e+002 IU/ml	HAN	430	HAN	01: Week 1	0	SOF / LDV	8	0	1
1a	< Titer min	HAN	7.5	HAN	04: Week 4	0	SOF / LDV	8	0	1
1a	Target Not Detected	HAN	0	HAN	08: Week 8	0	SOF / LDV	8	0	1
1a	Target Not Detected	HAN	0	HAN	28: FU W12	0	SOF / LDV	8	0	1
1a	2.16e+006 IU/ml	HAN	1600000	HAN	00: Baseline	0	SOF / LDV	12	0	0
1a	Target Not Detected	HAN	7.5	HAN	04: Week 4	0	SOF / LDV	12	0	0
1a	Target Not Detected	HAN	0	HAN	08: Week 8	0	SOF / LDV	12	0	0
1a	Target Not Detected	HAN	0	HAN	12: Week 12	0	SOF / LDV	12	0	0
1a	Target Not Detected	HAN	0	HAN	28: FU W12	0	SOF / LDV	12	0	0
1a	2.89e+006 IU/ml	HAN	3400000	HAN	00: Baseline	0	SOF / LDV	8	0	1
1a	4.95e+002 IU/ml	HAN	780	HAN	01: Week 1	0	SOF / LDV	8	0	1
1a	< Titer min	HAN	7.5	HAN	04: Week 4	0	SOF / LDV	8	0	1
1a	Target Not Detected	HAN	0	HAN	08: Week 8	0	SOF / LDV	8	0	1
1a	Target Not Detected	HAN	0	HAN	28: FU W12	0	SOF / LDV	8	0	1
1a	5.66e+005 IU/ml	HAN	370000	HAN	00: Baseline	0	SOF / LDV	24	1	0
1a	Target Not Detected	HAN	7.5	HAN	04: Week 4	0	SOF / LDV	24	1	0
1a	Target Not Detected	HAN	0	HAN	08: Week 8	0	SOF / LDV	24	1	0
1a	Target Not Detected	HAN	0	HAN	12: Week 12	0	SOF / LDV	24	1	0
1a	Target Not Detected	HAN	0	HAN	16: Week 16	0	SOF / LDV	24	1	0
1a	Target Not Detected	HAN	0	HAN	20: Week 20	0	SOF / LDV	24	1	0
1a	Target Not Detected	HAN	0	HAN	24: Week 24	0	SOF / LDV	24	1	0
1a	Target Not Detected	HAN	0	HAN	28: FU W12	0	SOF / LDV	24	1	0
1a	2.01e+005 IU/ml	HAN	120000	HAN	00: Baseline	0	RBV / Abb 3D	24	1	0
1a	< Titer min	HAN	21	HAN	02: Week 2	0	RBV / Abb 3D	24	1	0
1a	Target Not Detected	HAN	7.5	HAN	04: Week 4	0	RBV / Abb 3D	24	1	0
1a	Target Not Detected	HAN	0	HAN	08: Week 8	0	RBV / Abb 3D	24	1	0
1a	Target Not Detected	HAN	0	HAN	12: Week 12	0	RBV / Abb 3D	24	1	0
1a	Target Not Detected	HAN	0	HAN	16: Week 16	0	RBV / Abb 3D	24	1	0
1a	Target Not Detected	HAN	0	HAN	20: Week 20	0	RBV / Abb 3D	24	1	0
1a	Target Not Detected	HAN	0	HAN	24: Week 24	0	RBV / Abb 3D	24	1	0
1a	Target Not Detected	HAN	0	HAN	28: FU W12	0	RBV / Abb 3D	24	1	0
1b	6.06e+006 IU/ml	HAN	5500000	HAN	00: Baseline	0	SOF / LDV	8	0	1
1b	1.06e+003 IU/ml	HAN	4400	HAN	01: Week 1	0	SOF / LDV	8	0	1
1b	Target Not Detected	HAN	7.5	HAN	04: Week 4	0	SOF / LDV	8	0	1
1b	Target Not Detected	HAN	0	HAN	08: Week 8	0	SOF / LDV	8	0	1
1b	Target Not Detected	HAN	0	HAN	28: FU W12	0	SOF / LDV	8	0	1
1a	8.72e+006 IU/ml	HAN	5500000	HAN	00: Baseline	0	SOF / LDV	8	0	1
1a	1.16e+003 IU/ml	HAN	2200	HAN	01: Week 1	0	SOF / LDV	8	0	1
1a	< Titer min	HAN	7.5	HAN	04: Week 4	0	SOF / LDV	8	0	1
1a	Target Not Detected	HAN	0	HAN	08: Week 8	0	SOF / LDV	8	0	1
1a	Target Not Detected	HAN	0	HAN	28: FU W12	0	SOF / LDV	8	0	1
1b	1.91e+004 IU/ml	HAN	16000	HAN	00: Baseline	0	RBV / Abb 3D	12	1	1
1b	1.94e+001 IU/ml	HAN	7.5	HAN	02: Week 2	0	RBV / Abb 3D	12	1	1
1b	Target Not Detected	HAN	7.5	HAN	04: Week 4	0	RBV / Abb 3D	12	1	1
1b	Target Not Detected	HAN	0	HAN	12: Week 12	0	RBV / Abb 3D	12	1	1
1b	Target Not Detected	HAN	0	HAN	28: FU W12	0	RBV / Abb 3D	12	1	1
1a	4.76e+005 IU/ml	HAN	340000	HAN	00: Baseline	0	SOF / LDV	12	0	0
1a	3.75e+001 IU/ml	HAN	22	HAN	02: Week 2	0	SOF / LDV	12	0	0
1a	Target Not Detected	HAN	0	HAN	08: Week 8	0	SOF / LDV	12	0	0
1a	Target Not Detected	HAN	0	HAN	12: Week 12	0	SOF / LDV	12	0	0
1a	Target Not Detected	HAN	0	HAN	28: FU W12	0	SOF / LDV	12	0	0
1b	1.08e+007 IU/ml	HAN	9700000	HAN	00: Baseline	0	RBV / Abb 3D	12	1	1
1b	1.83e+001 IU/ml	HAN	64	HAN	02: Week 2	0	RBV / Abb 3D	12	1	1
1b	Target Not Detected	HAN	0	HAN	08: Week 8	0	RBV / Abb 3D	12	1	1
1b	Target Not Detected	HAN	0	HAN	12: Week 12	0	RBV / Abb 3D	12	1	1
1b	Target Not Detected	HAN	0	HAN	28: FU W12	0	RBV / Abb 3D	12	1	1
1b	5.14e+006 IU/ml	HAN	2400000	HAN	00: Baseline	0	SOF / LDV	24	1	0
1b	1.62e+003 IU/ml	HAN	2500	HAN	02: Week 2	0	SOF / LDV	24	1	0
1b	4.28e+001 IU/ml	HAN	48	HAN	08: Week 8	0	SOF / LDV	24	1	0
1b	Target Not Detected	HAN	0	HAN	12: Week 12	0	SOF / LDV	24	1	0
1b	Target Not Detected	HAN	0	HAN	16: Week 16	0	SOF / LDV	24	1	0
1b	Target Not Detected	HAN	0	HAN	20: Week 20	0	SOF / LDV	24	1	0
1b	Target Not Detected	HAN	0	HAN	24: Week 24	0	SOF / LDV	24	1	0
1b	Target Not Detected	HAN	0	HAN	28: FU W12	0	SOF / LDV	24	1	0
1a	3.93e+006 IU/ml	HAN	3100000	HAN	00: Baseline	0	SOF / LDV	12	0	0
1a	4.46e+001 IU/ml	HAN	59	HAN	02: Week 2	0	SOF / LDV	12	0	0
1a	Target Not Detected	HAN	0	HAN	08: Week 8	0	SOF / LDV	12	0	0
1a	Target Not Detected	HAN	0	HAN	12: Week 12	0	SOF / LDV	12	0	0
1a	Target Not Detected	HAN	0	HAN	28: FU W12	0	SOF / LDV	12	0	0
1b	5.87e+006 IU/ml	HAN	4400000	HAN	00: Baseline	0	SOF / LDV	12	0	0
1b	1.14e+002 IU/ml	HAN	90	HAN	02: Week 2	0	SOF / LDV	12	0	0
1b	Target Not Detected	HAN	0	HAN	08: Week 8	0	SOF / LDV	12	0	0
1b	Target Not Detected	HAN	0	HAN	12: Week 12	0	SOF / LDV	12	0	0
1b	Target Not Detected	HAN	0	HAN	28: FU W12	0	SOF / LDV	12	0	0
1b	8.17e+005 IU/ml	HAN	770000	HAN	00: Baseline	0	RBV / Abb 3D	12	0	1
1b	< Titer min	HAN	7.5	HAN	02: Week 2	0	RBV / Abb 3D	12	0	1
1b	Target Not Detected	HAN	0	HAN	08: Week 8	0	RBV / Abb 3D	12	0	1
1b	Target Not Detected	HAN	0	HAN	12: Week 12	0	RBV / Abb 3D	12	0	1
1b	Target Not Detected	HAN	0	HAN	28: FU W12	0	RBV / Abb 3D	12	0	1
1b	1.03e+006 IU/ml	HAN	1100000	HAN	00: Baseline	0	SOF / LDV	12	0	0
1b	2.24e+002 IU/ml	HAN	170	HAN	02: Week 2	0	SOF / LDV	12	0	0
1b	Target Not Detected	HAN	0	HAN	08: Week 8	0	SOF / LDV	12	0	0
1b	Target Not Detected	HAN	0	HAN	12: Week 12	0	SOF / LDV	12	0	0
1b	Target Not Detected	HAN	0	HAN	28: FU W12	0	SOF / LDV	12	0	0
1b	1.19e+004 IU/ml	HAN	15000	HAN	00: Baseline	0	Abb 3D	12	0	1
1b	Target Not Detected	HAN	7.5	HAN	02: Week 2	0	Abb 3D	12	0	1
1b	Target Not Detected	HAN	0	HAN	08: Week 8	0	Abb 3D	12	0	1
1b	Target Not Detected	HAN	0	HAN	28: FU W12	0	Abb 3D	12	0	1
1b	2.59e+006 IU/ml	HAN	1200000	HAN	00: Baseline	0	SOF / LDV	8	0	1
1b	8.15e+001 IU/ml	HAN	98	HAN	02: Week 2	0	SOF / LDV	8	0	1
1b	Target Not Detected	HAN	0	HAN	08: Week 8	0	SOF / LDV	8	0	1
1b	Target Not Detected	HAN	0	HAN	28: FU W12	0	SOF / LDV	8	0	1
1a	3.74e+005 IU/ml	HAN	750000	HAN	00: Baseline	0	RBV / Abb 3D	12	1	1
1a	3.79e+001 IU/ml	HAN	76	HAN	02: Week 2	0	RBV / Abb 3D	12	1	1
1a	Target Not Detected	HAN	0	HAN	08: Week 8	0	RBV / Abb 3D	12	1	1
1a	Target Not Detected	HAN	0	HAN	12: Week 12	0	RBV / Abb 3D	12	1	1
1a	Target Not Detected	HAN	0	HAN	28: FU W12	0	RBV / Abb 3D	12	1	1
1a	1.46e+006 IU/ml	HAN	1100000	HAN	00: Baseline	0	SOF / LDV	12	0	0
1a	< Titer min	HAN	7.5	HAN	02: Week 2	0	SOF / LDV	12	0	0
1a	Target Not Detected	HAN	0	HAN	08: Week 8	0	SOF / LDV	12	0	0
1a	Target Not Detected	HAN	0	HAN	12: Week 12	0	SOF / LDV	12	0	0
1b	5.83e+006 IU/ml	HAN	4000000	HAN	00: Baseline	0	Abb 3D	12	1	0
1b	7.91e+001 IU/ml	HAN	95	HAN	02: Week 2	0	Abb 3D	12	1	0
1b	Target Not Detected	HAN	0	HAN	08: Week 8	0	Abb 3D	12	1	0
1b	Target Not Detected	HAN	0	HAN	12: Week 12	0	Abb 3D	12	1	0
1b	Target Not Detected	HAN	0	HAN	28: FU W12	0	Abb 3D	12	1	0
1a	1.14e+006 IU/ml	HAN	1800000	HAN	00: Baseline	0	SOF / LDV	24	1	0
1a	1.70e+001 IU/ml	HAN	7.5	HAN	02: Week 2	0	SOF / LDV	24	1	0
1a	Target Not Detected	HAN	0	HAN	08: Week 8	0	SOF / LDV	24	1	0
1a	Target Not Detected	HAN	0	HAN	12: Week 12	0	SOF / LDV	24	1	0
1a	Target Not Detected	HAN	0	HAN	16: Week 16	0	SOF / LDV	24	1	0
1a	Target Not Detected	HAN	0	HAN	20: Week 20	0	SOF / LDV	24	1	0
1a	Target Not Detected	HAN	0	HAN	24: Week 24	0	SOF / LDV	24	1	0
1a	2.56e+006 IU/ml	HAN	1300000	HAN	00: Baseline	0	SOF / LDV	24	1	0
1a	4.91e+002 IU/ml	HAN	1000	HAN	02: Week 2	0	SOF / LDV	24	1	0
1a	Target Not Detected	HAN	0	HAN	08: Week 8	0	SOF / LDV	24	1	0
1a	Target Not Detected	HAN	0	HAN	12: Week 12	0	SOF / LDV	24	1	0
1a	Target Not Detected	HAN	0	HAN	16: Week 16	0	SOF / LDV	24	1	0
1a	Target Not Detected	HAN	0	HAN	20: Week 20	0	SOF / LDV	24	1	0
1a	Target Not Detected	HAN	0	HAN	24: Week 24	0	SOF / LDV	24	1	0
1b	8.03e+006 IU/ml	HAN	6400000	HAN	00: Baseline	0	RBV / SOF / LDV	12	1	0
1b	4.21e+002 IU/ml	HAN	580	HAN	02: Week 2	0	RBV / SOF / LDV	12	1	0
1b	Target Not Detected	HAN	0	HAN	08: Week 8	0	RBV / SOF / LDV	12	1	0
1b	Target Not Detected	HAN	0	HAN	12: Week 12	0	RBV / SOF / LDV	12	1	0
1b	Target Not Detected	HAN	0	HAN	28: FU W12	0	RBV / SOF / LDV	12	1	0
1a	9.71e+005 IU/ml	HAN	750000	HAN	00: Baseline	0	RBV / Abb 3D	12	0	0
1a	1.71e+001 IU/ml	HAN	7.5	HAN	02: Week 2	0	RBV / Abb 3D	12	0	0
1a	Target Not Detected	HAN	0	HAN	08: Week 8	0	RBV / Abb 3D	12	0	0
1a	Target Not Detected	HAN	0	HAN	12: Week 12	0	RBV / Abb 3D	12	0	0
1a	Target Not Detected	HAN	0	HAN	28: FU W12	0	RBV / Abb 3D	12	0	0
1a	8.50e+006 IU/ml	HAN	7700000	HAN	00: Baseline	0	RBV / SOF / LDV	12	1	0
1a	2.94e+002 IU/ml	HAN	420	HAN	02: Week 2	0	RBV / SOF / LDV	12	1	0
1a	Target Not Detected	HAN	0	HAN	08: Week 8	0	RBV / SOF / LDV	12	1	0
1a	Target Not Detected	HAN	0	HAN	12: Week 12	0	RBV / SOF / LDV	12	1	0
1a	Target Not Detected	HAN	0	HAN	28: FU W12	0	RBV / SOF / LDV	12	1	0
1b	1.35e+006 IU/ml	HAN	760000	HAN	00: Baseline	0	Abb 3D	12	0	0
1b	3.69e+001 IU/ml	HAN	7.5	HAN	02: Week 2	0	Abb 3D	12	0	0
1b	Target Not Detected	HAN	0	HAN	08: Week 8	0	Abb 3D	12	0	0
1b	Target Not Detected	HAN	0	HAN	12: Week 12	0	Abb 3D	12	0	0
1b	Target Not Detected	HAN	0	HAN	28: FU W12	0	Abb 3D	12	0	0
1a	1.06e+007 IU/ml	HAN	9300000	HAN	00: Baseline	0	RBV / SOF / LDV	12	0	0
1a	< Titer min	HAN	7.5	HAN	02: Week 2	0	RBV / SOF / LDV	12	0	0
1a	Target Not Detected	HAN	0	HAN	08: Week 8	0	RBV / SOF / LDV	12	0	0
1a	Target Not Detected	HAN	0	HAN	12: Week 12	0	RBV / SOF / LDV	12	0	0
1a	Target Not Detected	HAN	0	HAN	28: FU W12	0	RBV / SOF / LDV	12	0	0
1a	3.76e+006 IU/ml	HAN	2900000	HAN	00: Baseline	0	RBV / Abb 3D	12	0	0
1a	< Titer min	HAN	7.5	HAN	02: Week 2	0	RBV / Abb 3D	12	0	0
1a	Target Not Detected	HAN	0	HAN	08: Week 8	0	RBV / Abb 3D	12	0	0
1a	Target Not Detected	HAN	0	HAN	12: Week 12	0	RBV / Abb 3D	12	0	0
1a	Target Not Detected	HAN	0	HAN	28: FU W12	0	RBV / Abb 3D	12	0	0
1a	3.06e+006 IU/ml	HAN	1400000	HAN	00: Baseline	0	RBV / Abb 3D	12	0	0
1a	1.96e+001 IU/ml	HAN	0	HAN	02: Week 2	0	RBV / Abb 3D	12	0	0
1a	Target Not Detected	HAN	0	HAN	08: Week 8	0	RBV / Abb 3D	12	0	0
1a	Target Not Detected	HAN	0	HAN	12: Week 12	0	RBV / Abb 3D	12	0	0
1a	Target Not Detected	HAN	0	HAN	28: FU W12	0	RBV / Abb 3D	12	0	0
1b	6.20e+005 IU/ml	HAN	390000	HAN	00: Baseline	0	Abb 3D	12	1	1
1b	5.77e+006 IU/ml	HAN	4900000	HAN	02: Week 2	0	Abb 3D	12	1	1
1b	Target Not Detected	HAN	0	HAN	08: Week 8	0	Abb 3D	12	1	1
1b	Target Not Detected	HAN	0	HAN	12: Week 12	0	Abb 3D	12	1	1
1b	Target Not Detected	HAN	0	HAN	28: FU W12	0	Abb 3D	12	1	1
1b	1.60e+006 IU/ml	HAN	1000000	HAN	00: Baseline	0	SOF / LDV	12	1	1
1b	2.53e+002 IU/ml	HAN	680	HAN	02: Week 2	0	SOF / LDV	12	1	1
1b	Target Not Detected	HAN	0	HAN	08: Week 8	0	SOF / LDV	12	1	1
1b	Target Not Detected	HAN	0	HAN	12: Week 12	0	SOF / LDV	12	1	1
1b	Target Not Detected	HAN	0	HAN	28: FU W12	0	SOF / LDV	12	1	1
1b	1.09e+006 IU/ml	HAN	770000	HAN	00: Baseline	0	Abb 3D	12	1	1
1b	2.68e+001 IU/ml	HAN	230	HAN	02: Week 2	0	Abb 3D	12	1	1
1b	Target Not Detected	HAN	0	HAN	08: Week 8	0	Abb 3D	12	1	1
1b	Target Not Detected	HAN	0	HAN	12: Week 12	0	Abb 3D	12	1	1
1b	Target Not Detected	HAN	0	HAN	28: FU W12	0	Abb 3D	12	1	1
1b	1.34e+007 IU/ml	HAN	8900000	HAN	00: Baseline	0	SOF / LDV	24	0	0
1b	2.70e+001 IU/ml	HAN	7.5	HAN	02: Week 2	0	SOF / LDV	24	0	0
1b	< Titer min	HAN	0	HAN	08: Week 8	0	SOF / LDV	24	0	0
1b	Target Not Detected	HAN	0	HAN	12: Week 12	0	SOF / LDV	24	0	0
1b	Target Not Detected	HAN	0	HAN	16: Week 16	0	SOF / LDV	24	0	0
1b	Target Not Detected	HAN	0	HAN	20: Week 20	0	SOF / LDV	24	0	0
1b	Target Not Detected	HAN	0	HAN	24: Week 24	0	SOF / LDV	24	0	0
1b	Target Not Detected	HAN	0	HAN	28: FU W12	0	SOF / LDV	24	0	0
1a	4.78e+006 IU/ml	HAN	3900000	HAN	00: Baseline	0	RBV / Abb 3D	12	0	0
1a	4.32e+001 IU/ml	HAN	76	HAN	02: Week 2	0	RBV / Abb 3D	12	0	0
1a	Target Not Detected	HAN	0	HAN	08: Week 8	0	RBV / Abb 3D	12	0	0
1a	Target Not Detected	HAN	0	HAN	12: Week 12	0	RBV / Abb 3D	12	0	0
1a	Target Not Detected	HAN	0	HAN	28: FU W12	0	RBV / Abb 3D	12	0	0
1a	2.25e+006 IU/ml	HAN	2400000	HAN	00: Baseline	0	SOF / LDV	12	1	1
1a	8.98e+001 IU/ml	HAN	66	HAN	02: Week 2	0	SOF / LDV	12	1	1
1a	Target Not Detected	HAN	0	HAN	08: Week 8	0	SOF / LDV	12	1	1
1a	Target Not Detected	HAN	0	HAN	12: Week 12	0	SOF / LDV	12	1	1
1a	Target Not Detected	HAN	0	HAN	28: FU W12	0	SOF / LDV	12	1	1
1b	1.22e+006 IU/ml	HAN	510000	HAN	00: Baseline	0	SOF / LDV	12	0	0
1b	3.08e+001 IU/ml	HAN	41	HAN	02: Week 2	0	SOF / LDV	12	0	0
1b	Target Not Detected	HAN	0	HAN	08: Week 8	0	SOF / LDV	12	0	0
1b	Target Not Detected	HAN	0	HAN	12: Week 12	0	SOF / LDV	12	0	0
1b	Target Not Detected	HAN	0	HAN	28: FU W12	0	SOF / LDV	12	0	0
1b	2.97e+006 IU/ml	HAN	2200000	HAN	00: Baseline	0	RBV / Abb 3D	12	1	0
1b	5.52e+001 IU/ml	HAN	140	HAN	02: Week 2	0	RBV / Abb 3D	12	1	0
1b	Target Not Detected	HAN	0	HAN	08: Week 8	0	RBV / Abb 3D	12	1	0
1b	Target Not Detected	HAN	0	HAN	12: Week 12	0	RBV / Abb 3D	12	1	0
1b	Target Not Detected	HAN	0	HAN	28: FU W12	0	RBV / Abb 3D	12	1	0
1b	3.11e+006 IU/ml	HAN	2000000	HAN	00: Baseline	0	SOF / LDV	12	0	0
1b	< Titer min	HAN	26	HAN	02: Week 2	0	SOF / LDV	12	0	0
1b	Target Not Detected	HAN	0	HAN	08: Week 8	0	SOF / LDV	12	0	0
1b	Target Not Detected	HAN	0	HAN	12: Week 12	0	SOF / LDV	12	0	0
1b	Target Not Detected	HAN	0	HAN	28: FU W12	0	SOF / LDV	12	0	0
1b	3.84e+006 IU/ml	HAN	2800000	HAN	00: Baseline	0	SOF / LDV	12	0	0
1b	4.79e+001 IU/ml	HAN	75	HAN	02: Week 2	0	SOF / LDV	12	0	0
1b	Target Not Detected	HAN	0	HAN	08: Week 8	0	SOF / LDV	12	0	0
1b	Target Not Detected	HAN	0	HAN	12: Week 12	0	SOF / LDV	12	0	0
1b	Target Not Detected	HAN	0	HAN	28: FU W12	0	SOF / LDV	12	0	0
1b	2.76e+006 IU/ml	HAN	2200000	HAN	00: Baseline	0	Abb 3D	12	0	0
1b	Target Not Detected	HAN	0	HAN	02: Week 2	0	Abb 3D	12	0	0
1b	Target Not Detected	HAN	0	HAN	08: Week 8	0	Abb 3D	12	0	0
1b	Target Not Detected	HAN	0	HAN	12: Week 12	0	Abb 3D	12	0	0
1b	Target Not Detected	HAN	0	HAN	28: FU W12	0	Abb 3D	12	0	0
1b	8.42e+005 IU/ml	HAN	880000	HAN	00: Baseline	0	Abb 3D	12	0	0
1b	2.74e+001 IU/ml	HAN	7.5	HAN	02: Week 2	0	Abb 3D	12	0	0
1b	Target Not Detected	HAN	0	HAN	08: Week 8	0	Abb 3D	12	0	0
1b	Target Not Detected	HAN	0	HAN	12: Week 12	0	Abb 3D	12	0	0
1b	Target Not Detected	HAN	0	HAN	28: FU W12	0	Abb 3D	12	0	0
1b	2.13e+006 IU/ml	HAN	1100000	HAN	00: Baseline	0	RBV / Abb 3D	12	1	1
1b	3.40e+001 IU/ml	HAN	7.5	HAN	02: Week 2	0	RBV / Abb 3D	12	1	1
1b	Target Not Detected	HAN	0	HAN	08: Week 8	0	RBV / Abb 3D	12	1	1
1b	Target Not Detected	HAN	0	HAN	12: Week 12	0	RBV / Abb 3D	12	1	1
1b	Target Not Detected	HAN	0	HAN	28: FU W12	0	RBV / Abb 3D	12	1	1
1a	3.26e+006 IU/ml	HAN	2500000	HAN	00: Baseline	0	SOF / LDV	24	0	1
1a	2.23e+003 IU/ml	HAN	4400	HAN	02: Week 2	0	SOF / LDV	24	0	1
1a	Target Not Detected	HAN	0	HAN	08: Week 8	0	SOF / LDV	24	0	1
1a	Target Not Detected	HAN	0	HAN	12: Week 12	0	SOF / LDV	24	0	1
1a	Target Not Detected	HAN	0	HAN	16: Week 16	0	SOF / LDV	24	0	1
1a	Target Not Detected	HAN	0	HAN	20: Week 20	0	SOF / LDV	24	0	1
1a	Target Not Detected	HAN	0	HAN	28: FU W12	0	SOF / LDV	24	0	1
1b	1.68e+006 IU/ml	HAN	2700000	HAN	00: Baseline	0	RBV / Abb 3D	12	1	0
1b	3.82e+001 IU/ml	HAN	36	HAN	02: Week 2	0	RBV / Abb 3D	12	1	0
1b	Target Not Detected	HAN	0	HAN	08: Week 8	0	RBV / Abb 3D	12	1	0
1b	Target Not Detected	HAN	0	HAN	12: Week 12	0	RBV / Abb 3D	12	1	0
1b	Target Not Detected	HAN	0	HAN	28: FU W12	0	RBV / Abb 3D	12	1	0
1b	5.80e+005 IU/ml	HAN	400000	HAN	00: Baseline	0	SOF / LDV	24	1	1
1b	4.88e+001 IU/ml	HAN	16	HAN	02: Week 2	0	SOF / LDV	24	1	1
1b	< Titer min	HAN	0	HAN	08: Week 8	0	SOF / LDV	24	1	1
1b	Target Not Detected	HAN	0	HAN	12: Week 12	0	SOF / LDV	24	1	1
1b	Target Not Detected	HAN	0	HAN	16: Week 16	0	SOF / LDV	24	1	1
1b	Target Not Detected	HAN	0	HAN	20: Week 20	0	SOF / LDV	24	1	1
1b	Target Not Detected	HAN	0	HAN	24: Week 24	0	SOF / LDV	24	1	1
1b	Target Not Detected	HAN	0	HAN	28: FU W12	0	SOF / LDV	24	1	1
1b	3.91e+006 IU/ml	HAN	1900000	HAN	00: Baseline	0	SOF / LDV	24	1	0
1b	2.46e+002 IU/ml	HAN	390	HAN	02: Week 2	0	SOF / LDV	24	1	0
1b	Target Not Detected	HAN	0	HAN	08: Week 8	0	SOF / LDV	24	1	0
1b	Target Not Detected	HAN	0	HAN	12: Week 12	0	SOF / LDV	24	1	0
1b	Target Not Detected	HAN	0	HAN	16: Week 16	0	SOF / LDV	24	1	0
1b	Target Not Detected	HAN	0	HAN	20: Week 20	0	SOF / LDV	24	1	0
1b	Target Not Detected	HAN	0	HAN	24: Week 24	0	SOF / LDV	24	1	0
1b	Target Not Detected	HAN	0	HAN	28: FU W12	0	SOF / LDV	24	1	0
1b	4.91e+005 IU/ml	HAN	440000	HAN	00: Baseline	0	SOF / LDV	12	0	0
1b	< Titer min	HAN	7.5	HAN	02: Week 2	0	SOF / LDV	12	0	0
1b	Target Not Detected	HAN	0	HAN	08: Week 8	0	SOF / LDV	12	0	0
1b	Target Not Detected	HAN	0	HAN	12: Week 12	0	SOF / LDV	12	0	0
1b	Target Not Detected	HAN	0	HAN	28: FU W12	0	SOF / LDV	12	0	0
1a	3.41e+006 IU/ml	HAN	1700000	HAN	00: Baseline	0	SOF / LDV	12	0	0
1a	1.35e+002 IU/ml	HAN	290	HAN	02: Week 2	0	SOF / LDV	12	0	0
1a	Target Not Detected	HAN	0	HAN	08: Week 8	0	SOF / LDV	12	0	0
1a	Target Not Detected	HAN	0	HAN	12: Week 12	0	SOF / LDV	12	0	0
1a	Target Not Detected	HAN	0	HAN	28: FU W12	0	SOF / LDV	12	0	0
1b	4.49e+006 IU/ml	HAN	3700000	HAN	00: Baseline	0	SOF / LDV	24	1	0
1b	5.31e+002 IU/ml	HAN	750	HAN	02: Week 2	0	SOF / LDV	24	1	0
1b	Target Not Detected	HAN	0	HAN	12: Week 12	0	SOF / LDV	24	1	0
1b	Target Not Detected	HAN	0	HAN	16: Week 16	0	SOF / LDV	24	1	0
1b	Target Not Detected	HAN	0	HAN	20: Week 20	0	SOF / LDV	24	1	0
1b	Target Not Detected	HAN	0	HAN	24: Week 24	0	SOF / LDV	24	1	0
1b	Target Not Detected	HAN	0	HAN	28: FU W12	0	SOF / LDV	24	1	0
1a	6.76e+004 IU/ml	HAN	76000	HAN	00: Baseline	0	SOF / LDV	12	0	0
1a	Target Not Detected	HAN	0	HAN	02: Week 2	0	SOF / LDV	12	0	0
1a	Target Not Detected	HAN	0	HAN	08: Week 8	0	SOF / LDV	12	0	0
1a	Target Not Detected	HAN	0	HAN	12: Week 12	0	SOF / LDV	12	0	0
1a	Target Not Detected	HAN	0	HAN	28: FU W12	0	SOF / LDV	12	0	0
1a	7.03e+006 IU/ml	HAN	4300000	HAN	00: Baseline	0	RBV / SOF / LDV	12	0	0
1a	< Titer min	HAN	0	HAN	02: Week 2	0	RBV / SOF / LDV	12	0	0
1a	Target Not Detected	HAN	0	HAN	08: Week 8	0	RBV / SOF / LDV	12	0	0
1a	Target Not Detected	HAN	0	HAN	12: Week 12	0	RBV / SOF / LDV	12	0	0
1a	Target Not Detected	HAN	0	HAN	28: FU W12	0	RBV / SOF / LDV	12	0	0
1b	2.83e+006 IU/ml	HAN	3000000	HAN	00: Baseline	0	RBV / Abb 3D	12	1	1
1b	3.26e+001 IU/ml	HAN	36	HAN	02: Week 2	0	RBV / Abb 3D	12	1	1
1b	Target Not Detected	HAN	0	HAN	08: Week 8	0	RBV / Abb 3D	12	1	1
1b	Target Not Detected	HAN	0	HAN	12: Week 12	0	RBV / Abb 3D	12	1	1
1b	Target Not Detected	HAN	0	HAN	28: FU W12	0	RBV / Abb 3D	12	1	1
1a	1.86e+006 IU/ml	HAN	2400000	HAN	00: Baseline	0	SOF / LDV	12	1	1
1a	7.10e+001 IU/ml	HAN	91	HAN	02: Week 2	0	SOF / LDV	12	1	1
1a	Target Not Detected	HAN	0	HAN	08: Week 8	0	SOF / LDV	12	1	1
1a	Target Not Detected	HAN	0	HAN	12: Week 12	0	SOF / LDV	12	1	1
1a	Target Not Detected	HAN	0	HAN	28: FU W12	0	SOF / LDV	12	1	1
1b	4.47e+005 IU/ml	HAN	330000	HAN	00: Baseline	0	SOF / LDV	8	0	1
1b	Target Not Detected	HAN	0	HAN	02: Week 2	0	SOF / LDV	8	0	1
1b	Target Not Detected	HAN	0	HAN	04: Week 4	0	SOF / LDV	8	0	1
1b	Target Not Detected	HAN	0	HAN	08: Week 8	0	SOF / LDV	8	0	1
1b	Target Not Detected	HAN	0	HAN	28: FU W12	0	SOF / LDV	8	0	1
1b	6.13e+005 IU/ml	HAN	240000	HAN	00: Baseline	0	SOF / DCV	24	1	0
1b	2.76e+001 IU/ml	HAN	48	HAN	02: Week 2	0	SOF / DCV	24	1	0
1b	< Titer min	HAN	0	HAN	04: Week 4	0	SOF / DCV	24	1	0
1b	Target Not Detected	HAN	7.5	HAN	08: Week 8	0	SOF / DCV	24	1	0
1b	Target Not Detected	HAN	0	HAN	12: Week 12	0	SOF / DCV	24	1	0
1b	Target Not Detected	HAN	0	HAN	16: Week 16	0	SOF / DCV	24	1	0
1b	Target Not Detected	HAN	0	HAN	20: Week 20	0	SOF / DCV	24	1	0
1b	Target Not Detected	HAN	0	HAN	24: Week 24	0	SOF / DCV	24	1	0
1b	Target Not Detected	HAN	0	HAN	28: FU W12	0	SOF / DCV	24	1	0
1b	1.07e+005 IU/ml	HAN	160000	HAN	00: Baseline	0	SOF / RBV / DCV	24	1	0
1b	< Titer min	HAN	0	HAN	02: Week 2	0	SOF / RBV / DCV	24	1	0
1b	Target Not Detected	HAN	0	HAN	04: Week 4	0	SOF / RBV / DCV	24	1	0
1b	Target Not Detected	HAN	0	HAN	08: Week 8	0	SOF / RBV / DCV	24	1	0
1b	Target Not Detected	HAN	0	HAN	12: Week 12	0	SOF / RBV / DCV	24	1	0
1b	Target Not Detected	HAN	0	HAN	16: Week 16	0	SOF / RBV / DCV	24	1	0
1b	Target Not Detected	HAN	0	HAN	20: Week 20	0	SOF / RBV / DCV	24	1	0
1b	Target Not Detected	HAN	0	HAN	24: Week 24	0	SOF / RBV / DCV	24	1	0
1b	Target Not Detected	HAN	0	HAN	28: FU W12	0	SOF / RBV / DCV	24	1	0
1b	3.85e+006 IU/ml	HAN	1800000	HAN	00: Baseline	0	SOF / DAC	24	1	0
1b	4.09e+002 IU/ml	HAN	550	HAN	01: Week 1	0	SOF / DAC	24	1	0
1b	3.88e+001 IU/ml	HAN	79	HAN	02: Week 2	0	SOF / DAC	24	1	0
1b	Target Not Detected	HAN	0	HAN	04: Week 4	0	SOF / DAC	24	1	0
1b	Target Not Detected	HAN	0	HAN	08: Week 8	0	SOF / DAC	24	1	0
1b	Target Not Detected	HAN	0	HAN	12: Week 12	0	SOF / DAC	24	1	0
1b	Target Not Detected	HAN	0	HAN	16: Week 16	0	SOF / DAC	24	1	0
1b	Target Not Detected	HAN	0	HAN	20: Week 20	0	SOF / DAC	24	1	0
1b	Target Not Detected	HAN	0	HAN	24: Week 24	0	SOF / DAC	24	1	0
1b	Target Not Detected	HAN	0	HAN	28: FU W12	0	SOF / DAC	24	1	0
1a	3.06e+006 IU/ml	HAN	2200000	HAN	00: Baseline	0	SOF / DAC	24	1	0
1a	1.84e+002 IU/ml	HAN	120	HAN	02: Week 2	0	SOF / DAC	24	1	0
1a	1.64e+001 IU/ml	HAN	0	HAN	04: Week 4	0	SOF / DAC	24	1	0
1a	Target Not Detected	HAN	0	HAN	08: Week 8	0	SOF / DAC	24	1	0
1a	Target Not Detected	HAN	0	HAN	12: Week 12	0	SOF / DAC	24	1	0
1a	Target Not Detected	HAN	0	HAN	16: Week 16	0	SOF / DAC	24	1	0
1a	Target Not Detected	HAN	0	HAN	20: Week 20	0	SOF / DAC	24	1	0
1a	Target Not Detected	HAN	0	HAN	24: Week 24	0	SOF / DAC	24	1	0
1a	Target Not Detected	HAN	0	HAN	28: FU W12	0	SOF / DAC	24	1	0
1b	2.51e+005 IU/ml	HAN	620000	HAN	00: Baseline	0	SOF / DAC	24	1	0
1b	< Titer min	HAN	7.5	HAN	02: Week 2	0	SOF / DAC	24	1	0
1b	Target Not Detected	HAN	0	HAN	04: Week 4	0	SOF / DAC	24	1	0
1b	Target Not Detected	HAN	0	HAN	08: Week 8	0	SOF / DAC	24	1	0
1b	Target Not Detected	HAN	0	HAN	12: Week 12	0	SOF / DAC	24	1	0
1b	Target Not Detected	HAN	0	HAN	16: Week 16	0	SOF / DAC	24	1	0
1b	Target Not Detected	HAN	0	HAN	20: Week 20	0	SOF / DAC	24	1	0
1b	Target Not Detected	HAN	0	HAN	24: Week 24	0	SOF / DAC	24	1	0
1b	Target Not Detected	HAN	0	HAN	28: FU W12	0	SOF / DAC	24	1	0
1b	1.91e+006 IU/ml	HAN	1100000	HAN	00: Baseline	0	SOF / DAC	24	1	0
1b	Target Not Detected	HAN	7.5	HAN	02: Week 2	0	SOF / DAC	24	1	0
1b	Target Not Detected	HAN	0	HAN	04: Week 4	0	SOF / DAC	24	1	0
1b	Target Not Detected	HAN	0	HAN	08: Week 8	0	SOF / DAC	24	1	0
1b	Target Not Detected	HAN	0	HAN	12: Week 12	0	SOF / DAC	24	1	0
1b	Target Not Detected	HAN	0	HAN	16: Week 16	0	SOF / DAC	24	1	0
1b	Target Not Detected	HAN	0	HAN	20: Week 20	0	SOF / DAC	24	1	0
1b	Target Not Detected	HAN	0	HAN	24: Week 24	0	SOF / DAC	24	1	0
1b	Target Not Detected	HAN	0	HAN	28: FU W12	0	SOF / DAC	24	1	0
1a	3.50e+006 IU/ml	HAN	2400000	HAN	00: Baseline	0	SOF / LDV	12	1	0
1a	2.51e+001 IU/ml	HAN	18	HAN	02: Week 2	0	SOF / LDV	12	1	0
1a	Target Not Detected	HAN	0	HAN	04: Week 4	0	SOF / LDV	12	1	0
1a	Target Not Detected	HAN	0	HAN	12: Week 12	0	SOF / LDV	12	1	0
1a	Target Not Detected	HAN	0	HAN	28: FU W12	0	SOF / LDV	12	1	0
1a	4.45e+005 IU/ml	HAN	370000	HAN	00: Baseline	0	RBV / SOF / LDV	24	1	0
1a	Target Not Detected	HAN	0	HAN	04: Week 4	0	RBV / SOF / LDV	24	1	0
1a	Target Not Detected	HAN	0	HAN	08: Week 8	0	RBV / SOF / LDV	24	1	0
1a	Target Not Detected	HAN	0	HAN	12: Week 12	0	RBV / SOF / LDV	24	1	0
1a	Target Not Detected	HAN	0	HAN	16: Week 16	0	RBV / SOF / LDV	24	1	0
1a	Target Not Detected	HAN	0	HAN	20: Week 20	0	RBV / SOF / LDV	24	1	0
1a	Target Not Detected	HAN	0	HAN	24: Week 24	0	RBV / SOF / LDV	24	1	0
1a	Target Not Detected	HAN	0	HAN	28: FU W12	0	RBV / SOF / LDV	24	1	0
1a	6.82e+005 IU/ml	HAN	510000	HAN	00: Baseline	0	SOF / LDV	12	1	0
1a	Target Not Detected	HAN	0	HAN	04: Week 4	0	SOF / LDV	12	1	0
1a	Target Not Detected	HAN	0	HAN	08: Week 8	0	SOF / LDV	12	1	0
1a	Target Not Detected	HAN	0	HAN	12: Week 12	0	SOF / LDV	12	1	0
1a	Target Not Detected	HAN	0	HAN	28: FU W12	0	SOF / LDV	12	1	0
1b	4.56e+005 IU/ml	HAN	260000	HAN	00: Baseline	0	SOF / LDV	12	0	0
1b	Target Not Detected	HAN	0	HAN	04: Week 4	0	SOF / LDV	12	0	0
1b	Target Not Detected	HAN	0	HAN	08: Week 8	0	SOF / LDV	12	0	0
1b	Target Not Detected	HAN	0	HAN	12: Week 12	0	SOF / LDV	12	0	0
1b	Target Not Detected	HAN	0	HAN	28: FU W12	0	SOF / LDV	12	0	0
1a	2.40e+006 IU/ml	HAN	3700000	HAN	00: Baseline	0	SOF / LDV	24	1	0
1a	Target Not Detected	HAN	0	HAN	04: Week 4	0	SOF / LDV	24	1	0
1a	Target Not Detected	HAN	0	HAN	08: Week 8	0	SOF / LDV	24	1	0
1a	Target Not Detected	HAN	0	HAN	12: Week 12	0	SOF / LDV	24	1	0
1a	Target Not Detected	HAN	0	HAN	16: Week 16	0	SOF / LDV	24	1	0
1a	Target Not Detected	HAN	0	HAN	20: Week 20	0	SOF / LDV	24	1	0
1a	Target Not Detected	HAN	0	HAN	28: FU W12	0	SOF / LDV	24	1	0
1b	6.64e+005 IU/ml	HAN	500000	HAN	00: Baseline	0	RBV / SOF / LDV	12	1	0
1b	2.86e+001 IU/ml	HAN	20	HAN	02: Week 2	0	RBV / SOF / LDV	12	1	0
1b	Target Not Detected	HAN	0	HAN	04: Week 4	0	RBV / SOF / LDV	12	1	0
1b	Target Not Detected	HAN	0	HAN	08: Week 8	0	RBV / SOF / LDV	12	1	0
1b	Target Not Detected	HAN	0	HAN	12: Week 12	0	RBV / SOF / LDV	12	1	0
1b	Target Not Detected	HAN	0	HAN	28: FU W12	0	RBV / SOF / LDV	12	1	0
1b	8.60e+006 IU/ml	HAN	3900000	HAN	00: Baseline	0	Abb 3D	12	0	0
1b	Target Not Detected	HAN	0	HAN	04: Week 4	0	Abb 3D	12	0	0
1b	< Titer min	HAN	0	HAN	08: Week 8	0	Abb 3D	12	0	0
1b	Target Not Detected	HAN	0	HAN	12: Week 12	0	Abb 3D	12	0	0
1b	Target Not Detected	HAN	0	HAN	28: FU W12	0	Abb 3D	12	0	0
1a	1.75e+006 IU/ml	HAN	1100000	HAN	00: Baseline	0	SOF / LDV	12	0	1
1a	Target Not Detected	HAN	0	HAN	04: Week 4	0	SOF / LDV	12	0	1
1a	Target Not Detected	HAN	0	HAN	08: Week 8	0	SOF / LDV	12	0	1
1a	Target Not Detected	HAN	0	HAN	12: Week 12	0	SOF / LDV	12	0	1
1a	Target Not Detected	HAN	0	HAN	28: FU W12	0	SOF / LDV	12	0	1
1a	6.04e+006 IU/ml	HAN	3000000	HAN	00: Baseline	0	Abb 3D	12	0	0
1a	Target Not Detected	HAN	0	HAN	04: Week 4	0	Abb 3D	12	0	0
1a	Target Not Detected	HAN	0	HAN	08: Week 8	0	Abb 3D	12	0	0
1a	Target Not Detected	HAN	0	HAN	12: Week 12	0	Abb 3D	12	0	0
1a	Target Not Detected	HAN	0	HAN	28: FU W12	0	Abb 3D	12	0	0
1b	3.77e+006 IU/ml	HAN	1700000	HAN	00: Baseline	0	SOF / LDV	12	0	0
1b	Target Not Detected	HAN	0	HAN	04: Week 4	0	SOF / LDV	12	0	0
1b	Target Not Detected	HAN	0	HAN	08: Week 8	0	SOF / LDV	12	0	0
1b	Target Not Detected	HAN	0	HAN	12: Week 12	0	SOF / LDV	12	0	0
1b	Target Not Detected	HAN	0	HAN	28: FU W12	0	SOF / LDV	12	0	0
1b	1.26e+006 IU/ml	HAN	820000	HAN	00: Baseline	0	SOF / LDV	8	0	1
1b	7.02e+001 IU/ml	HAN	120	HAN	01: Week 1	0	SOF / LDV	8	0	1
1b	< Titer min	HAN	0	HAN	04: Week 4	0	SOF / LDV	8	0	1
1b	Target Not Detected	HAN	0	HAN	08: Week 8	0	SOF / LDV	8	0	1
1b	Target Not Detected	HAN	0	HAN	28: FU W12	0	SOF / LDV	8	0	1
1a	3.14e+006 IU/ml	HAN	3000000	HAN	00: Baseline	0	RBV / SOF / LDV	12	1	0
1a	3.37e+001 IU/ml	HAN	7.5	HAN	02: Week 2	0	RBV / SOF / LDV	12	1	0
1a	Target Not Detected	HAN	0	HAN	04: Week 4	0	RBV / SOF / LDV	12	1	0
1a	Target Not Detected	HAN	0	HAN	08: Week 8	0	RBV / SOF / LDV	12	1	0
1a	Target Not Detected	HAN	0	HAN	12: Week 12	0	RBV / SOF / LDV	12	1	0
1a	Target Not Detected	HAN	0	HAN	28: FU W12	0	RBV / SOF / LDV	12	1	0
1a	4.61e+005 IU/ml	HAN	470000	HAN	00: Baseline	0	SOF / LDV	12	0	0
1a	Target Not Detected	HAN	0	HAN	04: Week 4	0	SOF / LDV	12	0	0
1a	Target Not Detected	HAN	0	HAN	08: Week 8	0	SOF / LDV	12	0	0
1a	Target Not Detected	HAN	0	HAN	12: Week 12	0	SOF / LDV	12	0	0
1a	Target Not Detected	HAN	0	HAN	28: FU W12	0	SOF / LDV	12	0	0
1b	8.26e+005 IU/ml	HAN	820000	HAN	00: Baseline	0	Abb 3D	12	0	0
1b	3.20e+001 IU/ml	HAN	25	HAN	02: Week 2	0	Abb 3D	12	0	0
1b	Target Not Detected	HAN	0	HAN	04: Week 4	0	Abb 3D	12	0	0
1b	Target Not Detected	HAN	0	HAN	12: Week 12	0	Abb 3D	12	0	0
1b	Target Not Detected	HAN	0	HAN	28: FU W12	0	Abb 3D	12	0	0
1b	4.68e+006 IU/ml	HAN	3100000	HAN	00: Baseline	0	RBV / Abb 3D	12	1	0
1b	1.01e+002 IU/ml	HAN	250	HAN	02: Week 2	0	RBV / Abb 3D	12	1	0
1b	Target Not Detected	HAN	0	HAN	04: Week 4	0	RBV / Abb 3D	12	1	0
1b	Target Not Detected	HAN	0	HAN	12: Week 12	0	RBV / Abb 3D	12	1	0
1b	Target Not Detected	HAN	0	HAN	28: FU W12	0	RBV / Abb 3D	12	1	0
1b	1.39e+006 IU/ml	HAN	870000	HAN	00: Baseline	0	SOF / LDV	8	0	1
1b	4.09e+002 IU/ml	HAN	770	HAN	01: Week 1	0	SOF / LDV	8	0	1
1b	Target Not Detected	HAN	0	HAN	04: Week 4	0	SOF / LDV	8	0	1
1b	Target Not Detected	HAN	0	HAN	08: Week 8	0	SOF / LDV	8	0	1
1b	Target Not Detected	HAN	0	HAN	28: FU W12	0	SOF / LDV	8	0	1
1b	6.19e+005 IU/ml	HAN	700000	HAN	00: Baseline	0	SOF / LDV	12	0	1
1b	1.27e+002 IU/ml	HAN	36	HAN	01: Week 1	0	SOF / LDV	12	0	1
1b	< Titer min	HAN	0	HAN	02: Week 2	0	SOF / LDV	12	0	1
1b	Target Not Detected	HAN	0	HAN	04: Week 4	0	SOF / LDV	12	0	1
1b	Target Not Detected	HAN	0	HAN	08: Week 8	0	SOF / LDV	12	0	1
1b	Target Not Detected	HAN	0	HAN	12: Week 12	0	SOF / LDV	12	0	1
1b	Target Not Detected	HAN	0	HAN	28: FU W12	0	SOF / LDV	12	0	1
1b	1.06e+006 IU/ml	HAN	560000	HAN	00: Baseline	0	SOF / LDV	8	0	1
1b	3.25e+001 IU/ml	HAN	7.5	HAN	01: Week 1	0	SOF / LDV	8	0	1
1b	Target Not Detected	HAN	0	HAN	04: Week 4	0	SOF / LDV	8	0	1
1b	Target Not Detected	HAN	0	HAN	08: Week 8	0	SOF / LDV	8	0	1
1b	Target Not Detected	HAN	0	HAN	28: FU W12	0	SOF / LDV	8	0	1
1b	2.29e+006 IU/ml	HAN	1000000	HAN	00: Baseline	0	SOF / LDV	8	0	1
1b	1.01e+002 IU/ml	HAN	53	HAN	01: Week 1	0	SOF / LDV	8	0	1
1b	Target Not Detected	HAN	0	HAN	04: Week 4	0	SOF / LDV	8	0	1
1b	Target Not Detected	HAN	0	HAN	08: Week 8	0	SOF / LDV	8	0	1
1b	Target Not Detected	HAN	0	HAN	28: FU W12	0	SOF / LDV	8	0	1
1a	8.16e+006 IU/ml	HAN	6700000	HAN	00: Baseline	0	SOF / LDV	8	0	1
1a	Target Not Detected	HAN	0	HAN	02: Week 2	0	SOF / LDV	8	0	1
1a	Target Not Detected	HAN	0	HAN	04: Week 4	0	SOF / LDV	8	0	1
1a	Target Not Detected	HAN	0	HAN	08: Week 8	0	SOF / LDV	8	0	1
1a	Target Not Detected	HAN	0	HAN	28: FU W12	0	SOF / LDV	8	0	1
1b	1.31e+006 IU/ml	HAN	1100000	HAN	00: Baseline	0	SOF / LDV	8	0	1
1b	2.73e+001 IU/ml	HAN	7.5	HAN	02: Week 2	0	SOF / LDV	8	0	1
1b	Target Not Detected	HAN	0	HAN	04: Week 4	0	SOF / LDV	8	0	1
1b	< Titer min	HAN	0	HAN	08: Week 8	0	SOF / LDV	8	0	1
1b	Target Not Detected	HAN	0	HAN	28: FU W12	0	SOF / LDV	8	0	1
1a	3.17e+006 IU/ml	HAN	2600000	HAN	00: Baseline	0	SOF / LDV	12	1	1
1a	Target Not Detected	HAN	0	HAN	02: Week 2	0	SOF / LDV	12	1	1
1a	Target Not Detected	HAN	0	HAN	04: Week 4	0	SOF / LDV	12	1	1
1a	Target Not Detected	HAN	0	HAN	12: Week 12	0	SOF / LDV	12	1	1
1a	Target Not Detected	HAN	0	HAN	28: FU W12	0	SOF / LDV	12	1	1
1b	3.58e+004 IU/ml	HAN	52000	HAN	00: Baseline	0	SOF / LDV	12	1	1
1b	4.42e+001 IU/ml	HAN	68	HAN	02: Week 2	0	SOF / LDV	12	1	1
1b	Target Not Detected	HAN	0	HAN	12: Week 12	0	SOF / LDV	12	1	1
1b	Target Not Detected	HAN	0	HAN	28: FU W12	0	SOF / LDV	12	1	1
1a	7.45e+006 IU/ml	HAN	6800000	HAN	00: Baseline	0	SOF / LDV	8	0	1
1a	< Titer min	HAN	0	HAN	02: Week 2	0	SOF / LDV	8	0	1
1a	Target Not Detected	HAN	0	HAN	04: Week 4	0	SOF / LDV	8	0	1
1a	Target Not Detected	HAN	0	HAN	08: Week 8	0	SOF / LDV	8	0	1
1a	Target Not Detected	HAN	0	HAN	28: FU W12	0	SOF / LDV	8	0	1
1b	2.25e+005 IU/ml	HAN	140000	HAN	00: Baseline	0	SOF / LDV	8	0	1
1b	Target Not Detected	HAN	0	HAN	04: Week 4	0	SOF / LDV	8	0	1
1b	Target Not Detected	HAN	0	HAN	08: Week 8	0	SOF / LDV	8	0	1
1b	Target Not Detected	HAN	0	HAN	28: FU W12	0	SOF / LDV	8	0	1
1b	1.73e+006 IU/ml	HAN	980000	HAN	00: Baseline	0	Abb 3D	12	0	0
1b	9.28e+001 IU/ml	HAN	46	HAN	01: Week 1	0	Abb 3D	12	0	0
1b	1.88e+001 IU/ml	HAN	7.5	HAN	02: Week 2	0	Abb 3D	12	0	0
1b	Target Not Detected	HAN	0	HAN	04: Week 4	0	Abb 3D	12	0	0
1b	Target Not Detected	HAN	0	HAN	08: Week 8	0	Abb 3D	12	0	0
1b	Target Not Detected	HAN	0	HAN	12: Week 12	0	Abb 3D	12	0	0
1b	Target Not Detected	HAN	0	HAN	28: FU W12	0	Abb 3D	12	0	0
1a	2.29e+006 IU/ml	HAN	1400000	HAN	00: Baseline	0	SOF / LDV	12	0	0
1a	Target Not Detected	HAN	0	HAN	04: Week 4	0	SOF / LDV	12	0	0
1a	Target Not Detected	HAN	0	HAN	08: Week 8	0	SOF / LDV	12	0	0
1a	Target Not Detected	HAN	0	HAN	12: Week 12	0	SOF / LDV	12	0	0
1a	Target Not Detected	HAN	0	HAN	28: FU W12	0	SOF / LDV	12	0	0
1b	1.79e+005 IU/ml	HAN	140000	HAN	00: Baseline	0	SOF / LDV	8	0	1
1b	1.16e+002 IU/ml	HAN	130	HAN	01: Week 1	0	SOF / LDV	8	0	1
1b	Target Not Detected	HAN	0	HAN	04: Week 4	0	SOF / LDV	8	0	1
1b	Target Not Detected	HAN	0	HAN	08: Week 8	0	SOF / LDV	8	0	1
1b	Target Not Detected	HAN	0	HAN	28: FU W12	0	SOF / LDV	8	0	1
3	7.10e+005 IU/ml	HAN	370000	HAN	00: Baseline	0	SOF / DAC / RBV	24	maas	0
3	Target Not Detected	HAN	7.5	HAN	02: Week 2	0	SOF / DAC / RBV	24	1	0
3	Target Not Detected	HAN	0	HAN	04: Week 4	0	SOF / DAC / RBV	24	1	0
3	Target Not Detected	HAN	0	HAN	08: Week 8	0	SOF / DAC / RBV	24	1	0
3	Target Not Detected	HAN	0	HAN	12: Week 12	0	SOF / DAC / RBV	24	1	0
3	Target Not Detected	HAN	0	HAN	16: Week 16	0	SOF / DAC / RBV	24	1	0
3	Target Not Detected	HAN	0	HAN	20: Week 20	0	SOF / DAC / RBV	24	1	0
3	Target Not Detected	HAN	0	HAN	28: FU W12	0	SOF / DAC / RBV	24	1	0
3	1.26e+005 IU/ml	HAN	170000	HAN	00: Baseline	0	SOF / DAC / RBV	24	1	0
3	5.64e+001 IU/ml	HAN	86	HAN	01: Week 1	0	SOF / DAC / RBV	24	1	0
3	< Titer min	HAN	48	HAN	02: Week 2	0	SOF / DAC / RBV	24	1	0
3	< Titer min	HAN	7.5	HAN	04: Week 4	0	SOF / DAC / RBV	24	1	0
3	Target Not Detected	HAN	0	HAN	08: Week 8	0	SOF / DAC / RBV	24	1	0
3	Target Not Detected	HAN	0	HAN	12: Week 12	0	SOF / DAC / RBV	24	1	0
3	Target Not Detected	HAN	0	HAN	20: Week 20	0	SOF / DAC / RBV	24	1	0
3	Target Not Detected	HAN	0	HAN	24: Week 24	0	SOF / DAC / RBV	24	1	0
3	Target Not Detected	HAN	0	HAN	28: FU W12	0	SOF / DAC / RBV	24	1	0
3	3.00e+006 IU/ml	HAN	1900000	HAN	00: Baseline	0	SOF / DCV / RBV	24	1	0
3	3.29e+002 IU/ml	HAN	340	HAN	01: Week 1	0	SOF / DCV / RBV	24	1	0
3	4.03e+001 IU/ml	HAN	75	HAN	02: Week 2	0	SOF / DCV / RBV	24	1	0
3	Target Not Detected	HAN	7.5	HAN	04: Week 4	0	SOF / DCV / RBV	24	1	0
3	Target Not Detected	HAN	0	HAN	08: Week 8	0	SOF / DCV / RBV	24	1	0
3	Target Not Detected	HAN	0	HAN	12: Week 12	0	SOF / DCV / RBV	24	1	0
3	Target Not Detected	HAN	0	HAN	16: Week 16	0	SOF / DCV / RBV	24	1	0
3	Target Not Detected	HAN	0	HAN	20: Week 20	0	SOF / DCV / RBV	24	1	0
3	Target Not Detected	HAN	0	HAN	24: Week 24	0	SOF / DCV / RBV	24	1	0
3	Target Not Detected	HAN	0	HAN	28: FU W12	0	SOF / DCV / RBV	24	1	0
3	2.03e+006 IU/ml	HAN	1700000	HAN	00: Baseline	0	SOF / RBV	24	1	0
3	7.96e+001 IU/ml	HAN	85	HAN	02: Week 2	0	SOF / RBV	24	1	0
3	< Titer min	HAN	7.5	HAN	04: Week 4	0	SOF / RBV	24	1	0
3	Target Not Detected	HAN	0	HAN	08: Week 8	0	SOF / RBV	24	1	0
3	Target Not Detected	HAN	0	HAN	12: Week 12	0	SOF / RBV	24	1	0
3	Target Not Detected	HAN	0	HAN	16: Week 16	0	SOF / RBV	24	1	0
3	Target Not Detected	HAN	0	HAN	20: Week 20	0	SOF / RBV	24	1	0
3	Target Not Detected	HAN	0	HAN	24: Week 24	0	SOF / RBV	24	1	0
3	2.77e+005 IU/ml	HAN	480000	HAN	00: Baseline	0	SOF / RBV	24	0	0
3	7.50e+001 IU/ml	HAN	120	HAN	01: Week 1	0	SOF / RBV	24	0	0
3	< Titer min	HAN	7.5	HAN	02: Week 2	0	SOF / RBV	24	0	0
3	Target Not Detected	HAN	0	HAN	04: Week 4	0	SOF / RBV	24	0	0
3	Target Not Detected	HAN	0	HAN	08: Week 8	0	SOF / RBV	24	0	0
3	Target Not Detected	HAN	0	HAN	12: Week 12	0	SOF / RBV	24	0	0
3	Target Not Detected	HAN	0	HAN	16: Week 16	0	SOF / RBV	24	0	0
3	Target Not Detected	HAN	0	HAN	20: Week 20	0	SOF / RBV	24	0	0
3	Target Not Detected	HAN	0	HAN	24: Week 24	0	SOF / RBV	24	0	0
3	Target Not Detected	HAN	0	HAN	28: FU W12	0	SOF / RBV	24	0	0
3	6.16e+006 IU/ml	HAN	4600000	HAN	00: Baseline	0	SOF / RBV	24	1	0
3	3.03e+002 IU/ml	HAN	540	HAN	01: Week 1	0	SOF / RBV	24	1	0
3	4.47e+001 IU/ml	HAN	62	HAN	02: Week 2	0	SOF / RBV	24	1	0
3	2.78e+001 IU/ml	HAN	32	HAN	04: Week 4	0	SOF / RBV	24	1	0
3	Target Not Detected	HAN	0	HAN	08: Week 8	0	SOF / RBV	24	1	0
3	Target Not Detected	HAN	0	HAN	12: Week 12	0	SOF / RBV	24	1	0
3	Target Not Detected	HAN	0	HAN	16: Week 16	0	SOF / RBV	24	1	0
3	Target Not Detected	HAN	0	HAN	20: Week 20	0	SOF / RBV	24	1	0
3	Target Not Detected	HAN	0	HAN	24: Week 24	0	SOF / RBV	24	1	0
3	Target Not Detected	HAN	0	HAN	28: FU W12	0	SOF / RBV	24	1	0
3	5.58e+006 IU/ml	HAN	5900000	HAN	00: Baseline	0	SOF / RBV	24	0	1
3	< Titer min	HAN	7.5	HAN	02: Week 2	0	SOF / RBV	24	0	1
3	Target Not Detected	HAN	0	HAN	08: Week 8	0	SOF / RBV	24	0	1
3	< Titer min	HAN	0	HAN	12: Week 12	0	SOF / RBV	24	0	1
3	Target Not Detected	HAN	0	HAN	16: Week 16	0	SOF / RBV	24	0	1
3	Target Not Detected	HAN	0	HAN	20: Week 20	0	SOF / RBV	24	0	1
3	Target Not Detected	HAN	0	HAN	24: Week 24	0	SOF / RBV	24	0	1
3	5.16e+006 IU/ml	HAN	4300000	HAN	00: Baseline	0	SOF / RBV	24	1	0
3	2.04e+002 IU/ml	HAN	240	HAN	01: Week 1	0	SOF / RBV	24	1	0
3	5.53e+001 IU/ml	HAN	20	HAN	02: Week 2	0	SOF / RBV	24	1	0
3	< Titer min	HAN	7.5	HAN	04: Week 4	0	SOF / RBV	24	1	0
3	Target Not Detected	HAN	0	HAN	08: Week 8	0	SOF / RBV	24	1	0
3	Target Not Detected	HAN	0	HAN	12: Week 12	0	SOF / RBV	24	1	0
3	Target Not Detected	HAN	0	HAN	16: Week 16	0	SOF / RBV	24	1	0
3	Target Not Detected	HAN	0	HAN	20: Week 20	0	SOF / RBV	24	1	0
3	Target Not Detected	HAN	0	HAN	24: Week 24	0	SOF / RBV	24	1	0
3	Target Not Detected	HAN	0	HAN	28: FU W12	0	SOF / RBV	24	1	0
3	5.89e+005 IU/ml	HAN	730000	HAN	00: Baseline	0	SOF / RBV	24	0	0
3	< Titer min	HAN	7.5	HAN	02: Week 2	0	SOF / RBV	24	0	0
3	Target Not Detected	HAN	0	HAN	04: Week 4	0	SOF / RBV	24	0	0
3	Target Not Detected	HAN	0	HAN	08: Week 8	0	SOF / RBV	24	0	0
3	Target Not Detected	HAN	0	HAN	12: Week 12	0	SOF / RBV	24	0	0
3	Target Not Detected	HAN	0	HAN	16: Week 16	0	SOF / RBV	24	0	0
3	Target Not Detected	HAN	0	HAN	20: Week 20	0	SOF / RBV	24	0	0
3	Target Not Detected	HAN	0	HAN	24: Week 24	0	SOF / RBV	24	0	0
3	Target Not Detected	HAN	0	HAN	28: FU W12	0	SOF / RBV	24	0	0
3	4.47e+005 IU/ml	HAN	650000	HAN	00: Baseline	0	RBV / SOF / LDV	24	1	0
3	< Titer min	HAN	7.5	HAN	02: Week 2	0	RBV / SOF / LDV	24	1	0
3	Target Not Detected	HAN	0	HAN	08: Week 8	0	RBV / SOF / LDV	24	1	0
3	Target Not Detected	HAN	0	HAN	12: Week 12	0	RBV / SOF / LDV	24	1	0
3	Target Not Detected	HAN	0	HAN	16: Week 16	0	RBV / SOF / LDV	24	1	0
3	Target Not Detected	HAN	0	HAN	20: Week 20	0	RBV / SOF / LDV	24	1	0
3	Target Not Detected	HAN	0	HAN	24: Week 24	0	RBV / SOF / LDV	24	1	0
3	Target Not Detected	HAN	0	HAN	28: FU W12	0	RBV / SOF / LDV	24	1	0
3	5.60e+006 IU/ml	HAN	4500000	HAN	00: Baseline	0	SOF / DAC	24	1	1
3	8.46e+002 IU/ml	HAN	490	HAN	02: Week 2	0	SOF / DAC	24	1	1
3	3.01e+001 IU/ml	HAN	72	HAN	04: Week 4	0	SOF / DAC	24	1	1
3	< Titer min	HAN	0	HAN	08: Week 8	0	SOF / DAC	24	1	1
3	< Titer min	HAN	0	HAN	12: Week 12	0	SOF / DAC	24	1	1
3	Target Not Detected	HAN	0	HAN	16: Week 16	0	SOF / DAC	24	1	1
3	< Titer min	HAN	0	HAN	20: Week 20	0	SOF / DAC	24	1	1
3	Target Not Detected	HAN	0	HAN	24: Week 24	0	SOF / DAC	24	1	1
3	Target Not Detected	HAN	0	HAN	28: FU W12	0	SOF / DAC	24	1	1
3	2.22e+004 IU/ml	HAN	24000	HAN	00: Baseline	0	SOF / DAC	12	0	1
3	Target Not Detected	HAN	0	HAN	02: Week 2	0	SOF / DAC	12	0	1
3	Target Not Detected	HAN	0	HAN	04: Week 4	0	SOF / DAC	12	0	1
3	Target Not Detected	HAN	0	HAN	12: Week 12	0	SOF / DAC	12	0	1
3	Target Not Detected	HAN	0	HAN	28: FU W12	0	SOF / DAC	12	0	1
3	4.15e+005 IU/ml	HAN	390000	HAN	00: Baseline	0	SOF / DAC	12	1	0
3	4.58e+001 IU/ml	HAN	48	HAN	02: Week 2	0	SOF / DAC	12	1	0
3	Target Not Detected	HAN	0	HAN	04: Week 4	0	SOF / DAC	12	1	0
3	Target Not Detected	HAN	0	HAN	12: Week 12	0	SOF / DAC	12	1	0
3	Target Not Detected	HAN	0	HAN	28: FU W12	0	SOF / DAC	12	1	0
3	1.01e+006 IU/ml	HAN	510000	HAN	00: Baseline	0	SOF / DAC	24	1	1
3	Target Not Detected	HAN	7.5	HAN	02: Week 2	0	SOF / DAC	24	1	1
3	Target Not Detected	HAN	0	HAN	08: Week 8	0	SOF / DAC	24	1	1
3	Target Not Detected	HAN	0	HAN	12: Week 12	0	SOF / DAC	24	1	1
3	Target Not Detected	HAN	0	HAN	16: Week 16	0	SOF / DAC	24	1	1
3	Target Not Detected	HAN	0	HAN	20: Week 20	0	SOF / DAC	24	1	1
3	Target Not Detected	HAN	0	HAN	24: Week 24	0	SOF / DAC	24	1	1
3	5.76e+006 IU/ml	HAN	6900000	HAN	00: Baseline	0	SOF / DAC	12	0	1
3	2.44e+001 IU/ml	HAN	48	HAN	02: Week 2	0	SOF / DAC	12	0	1
3	Target Not Detected	HAN	0	HAN	08: Week 8	0	SOF / DAC	12	0	1
3	Target Not Detected	HAN	0	HAN	12: Week 12	0	SOF / DAC	12	0	1
3	Target Not Detected	HAN	0	HAN	28: FU W12	0	SOF / DAC	12	0	1
3	5.36e+006 IU/ml	HAN	6000000	HAN	00: Baseline	0	SOF / DAC	12	0	0
3	< Titer min	HAN	57	HAN	02: Week 2	0	SOF / DAC	12	0	0
3	Target Not Detected	HAN	0	HAN	08: Week 8	0	SOF / DAC	12	0	0
3	Target Not Detected	HAN	0	HAN	12: Week 12	0	SOF / DAC	12	0	0
3	Target Not Detected	HAN	0	HAN	28: FU W12	0	SOF / DAC	12	0	0
3	3.18e+006 IU/ml	HAN	2900000	HAN	00: Baseline	0	SOF / DAC	12	0	1
3	< Titer min	HAN	98	HAN	02: Week 2	0	SOF / DAC	12	0	1
3	Target Not Detected	HAN	7.5	HAN	08: Week 8	0	SOF / DAC	12	0	1
3	Target Not Detected	HAN	0	HAN	12: Week 12	0	SOF / DAC	12	0	1
3	Target Not Detected	HAN	0	HAN	28: FU W12	0	SOF / DAC	12	0	1
3	3.62e+005 IU/ml	HAN	320000	HAN	00: Baseline	0	SOF / DAC	24	1	0
3	< Titer min	HAN	19	HAN	02: Week 2	0	SOF / DAC	24	1	0
3	Target Not Detected	HAN	0	HAN	08: Week 8	0	SOF / DAC	24	1	0
3	Target Not Detected	HAN	0	HAN	12: Week 12	0	SOF / DAC	24	1	0
3	Target Not Detected	HAN	0	HAN	16: Week 16	0	SOF / DAC	24	1	0
3	Target Not Detected	HAN	0	HAN	20: Week 20	0	SOF / DAC	24	1	0
3	Target Not Detected	HAN	0	HAN	24: Week 24	0	SOF / DAC	24	1	0
3	6.73e+005 IU/ml	HAN	680000	HAN	00: Baseline	0	SOF / RBV / DAC	16	1	1
3	< Titer min	HAN	72	HAN	02: Week 2	0	SOF / RBV / DAC	16	1	1
3	Target Not Detected	HAN	0	HAN	08: Week 8	0	SOF / RBV / DAC	16	1	1
3	Target Not Detected	HAN	0	HAN	12: Week 12	0	SOF / RBV / DAC	16	1	1
3	Target Not Detected	HAN	0	HAN	16: Week 16	0	SOF / RBV / DAC	16	1	1
3	Target Not Detected	HAN	0	HAN	28: FU W12	0	SOF / RBV / DAC	16	1	1
3	8.89e+005 IU/ml	HAN	1400000	HAN	00: Baseline	1	SOF/ RBV	24	1	0
3	7.54e+002 IU/ml	HAN	380	HAN	01: Week 1	1	SOF/ RBV	24	1	0
3	7.67e+001 IU/ml	HAN	58	HAN	02: Week 2	1	SOF/ RBV	24	1	0
3	1.64e+001 IU/ml	HAN	27	HAN	04: Week 4	1	SOF/ RBV	24	1	0
3	< Titer min	HAN	0	HAN	08: Week 8	1	SOF/ RBV	24	1	0
3	Target Not Detected	HAN	0	HAN	12: Week 12	1	SOF/ RBV	24	1	0
3	Target Not Detected	HAN	0	HAN	16: Week 16	1	SOF/ RBV	24	1	0
3	Target Not Detected	HAN	0	HAN	20: Week 20	1	SOF/ RBV	24	1	0
3	Target Not Detected	HAN	0	HAN	24: Week 24	1	SOF/ RBV	24	1	0
3	4.29e+005 IU/ml	HAN	290000	HAN	28: FU W12	1	SOF/ RBV	24	1	0
3	6.01e+005 IU/ml	HAN	640000	HAN	00: Baseline	1	SOF/ RBV	24	1	1
N/A	2.27e+005 IU/ml	HAN	130000	HAN	00: Baseline	1	SOF/ RBV	24
3	1.49e+002 IU/ml	HAN	300	HAN	01: Week 1	1	SOF/ RBV	24	1	1
3	4.79e+001 IU/ml	HAN	51	HAN	02: Week 2	1	SOF/ RBV	24	1	1
N/A	< Titer min	HAN	19	HAN	02: Week 2	1	SOF/ RBV	24
3	< Titer min	HAN	26	HAN	04: Week 4	1	SOF/ RBV	24	1	1
3	< Titer min	HAN	0	HAN	08: Week 8	1	SOF/ RBV	24	1	1
3	Target Not Detected	HAN	0	HAN	12: Week 12	1	SOF/ RBV	24	1	1
3	Target Not Detected	HAN	0	HAN	16: Week 16	1	SOF/ RBV	24	1	1
3	Target Not Detected	HAN	0	HAN	20: Week 20	1	SOF/ RBV	24	1	1
3	< Titer min	HAN	0	HAN	24: Week 24	1	SOF/ RBV	24	1	1
3	4.29e+005 IU/ml	HAN	230000	HAN	28: FU W12	1	SOF/ RBV	24	1	1
3	9.63e+005 IU/ml	HAN	920000	HAN	00: Baseline	1	SOF/ RBV	24	1	1
3	1.04e+002 IU/ml	HAN	180	HAN	01: Week 1	1	SOF/ RBV	24	1	1
3	Target Not Detected	HAN	0	HAN	04: Week 4	1	SOF/ RBV	24	1	1
3	< Titer min	HAN	7.5	HAN	08: Week 8	1	SOF/ RBV	24	1	1
3	Target Not Detected	HAN	0	HAN	12: Week 12	1	SOF/ RBV	24	1	1
3	Target Not Detected	HAN	0	HAN	20: Week 20	1	SOF/ RBV	24	1	1
3	Target Not Detected	HAN	0	HAN	24: Week 24	1	SOF/ RBV	24	1	1
3	Target Not Detected	HAN	150000	HAN	28: FU W12	1	SOF/ RBV	24	1	1
3	9.53e+005 IU/ml	HAN	670000	HAN	00: Baseline	0	SOF/ RBV	24	1	1
3	Target Not Detected	HAN	7.5	HAN	02: Week 2	0	SOF/ RBV	24	1	1
3	Target Not Detected	HAN	0	HAN	04: Week 4	0	SOF/ RBV	24	1	1
3	Target Not Detected	HAN	0	HAN	08: Week 8	0	SOF/ RBV	24	1	1
3	Target Not Detected	HAN	0	HAN	12: Week 12	0	SOF/ RBV	24	1	1
3	Target Not Detected	HAN	0	HAN	16: Week 16	0	SOF/ RBV	24	1	1
3	Target Not Detected	HAN	0	HAN	20: Week 20	0	SOF/ RBV	24	1	1
3	Target Not Detected	HAN	0	HAN	28: FU W12	0	SOF/ RBV	24	1	1
3	7.14e+002 IU/ml	HAN	1300	HAN	01: Week 1	0	SOF/ RBV	24	1	1
3	8.48e+001 IU/ml	HAN	110	HAN	02: Week 2	0	SOF/ RBV	24	1	1
3	1.79e+001 IU/ml	HAN	7.5	HAN	04: Week 4	0	SOF/ RBV	24	1	1
3	Target Not Detected	HAN	0	HAN	08: Week 8	0	SOF/ RBV	24	1	1
3	Target Not Detected	HAN	0	HAN	12: Week 12	0	SOF/ RBV	24	1	1
3	Target Not Detected	HAN	0	HAN	16: Week 16	0	SOF/ RBV	24	1	1
3	Target Not Detected	HAN	0	HAN	20: Week 20	0	SOF/ RBV	24	1	1
3	Target Not Detected	HAN	0	HAN	24: Week 24	0	SOF/ RBV	24	1	1
3	Target Not Detected	HAN	0	HAN	28: FU W12	0	SOF/ RBV	24	1	1
3	4.63e+005 IU/ml	HAN	760000	HAN	00: Baseline	0	SOF/ RBV	24	1	1
3	< Titer min	HAN	0	HAN	01: Week 1	0	SOF/ RBV	24	1	1
3	Target Not Detected	HAN	7.5	HAN	04: Week 4	0	SOF/ RBV	24	1	1
3	Target Not Detected	HAN	0	HAN	08: Week 8	0	SOF/ RBV	24	1	1
3	Target Not Detected	HAN	0	HAN	12: Week 12	0	SOF/ RBV	24	1	1
3	Target Not Detected	HAN	0	HAN	16: Week 16	0	SOF/ RBV	24	1	1
3	Target Not Detected	HAN	0	HAN	20: Week 20	0	SOF/ RBV	24	1	1
3	Target Not Detected	HAN	0	HAN	24: Week 24	0	SOF/ RBV	24	1	1
3	Target Not Detected	HAN	0	HAN	28: FU W12	0	SOF/ RBV	24	1	1
1b	2.27e+005 IU/ml	HAN	130000	HAN	00: Baseline	1	SOF / LDV	12	1	1
1b	< Titer min	HAN	19	HAN	02: Week 2	1	SOF / LDV	12	1	1
1b	Target Not Detected	HAN	0	HAN	08: Week 8	1	SOF / LDV	12	1	1
1a	3.16e+006 IU/ml	HAN	1900000	HAN	00: Baseline	0	RBV / SOF / LDV	12	1	0
1a	2.90e+002 IU/ml	HAN	460	HAN	02: Week 2	0	RBV / SOF / LDV	12	1	0
1a	Target Not Detected	HAN	0	HAN	08: Week 8	0	RBV / SOF / LDV	12	1	0
1a	Target Not Detected	HAN	0	HAN	12: Week 12	0	RBV / SOF / LDV	12	1	0
3	2.01e+006 IU/ml	HAN	2100000	HAN	00: Baseline	0	SOF/ RBV	24	1	1
3	2.22e+001 IU/ml	HAN	7.5	HAN	02: Week 2	0	SOF/ RBV	24	1	1
3	Target Not Detected	HAN	7.5	HAN	04: Week 4	0	SOF/ RBV	24	1	1
3	Target Not Detected	HAN	0	HAN	08: Week 8	0	SOF/ RBV	24	1	1
3	Target Not Detected	HAN	0	HAN	12: Week 12	0	SOF/ RBV	24	1	1
3	Target Not Detected	HAN	0	HAN	16: Week 16	0	SOF/ RBV	24	1	1
3	Target Not Detected	HAN	0	HAN	20: Week 20	0	SOF/ RBV	24	1	1
3	Target Not Detected	HAN	0	HAN	24: Week 24	0	SOF/ RBV	24	1	1
3	Target Not Detected	HAN	0	HAN	28: FU W12	0	SOF/ RBV	24	1	1
3	1.07e+006 IU/ml	HAN	2900000	HAN	00: Baseline	0	SOF/ RBV	24	1	1
3	6.02e+001 IU/ml	HAN	77	HAN	01: Week 1	0	SOF/ RBV	24	1	1
3	< Titer min	HAN	7.5	HAN	02: Week 2	0	SOF/ RBV	24	1	1
3	Target Not Detected	HAN	7.5	HAN	04: Week 4	0	SOF/ RBV	24	1	1
3	Target Not Detected	HAN	0	HAN	08: Week 8	0	SOF/ RBV	24	1	1
3	Target Not Detected	HAN	0	HAN	12: Week 12	0	SOF/ RBV	24	1	1
3	Target Not Detected	HAN	0	HAN	16: Week 16	0	SOF/ RBV	24	1	1
3	Target Not Detected	HAN	0	HAN	20: Week 20	0	SOF/ RBV	24	1	1
3	3.14e+001 IU/ml	HAN	0	HAN	24: Week 24	0	SOF/ RBV	24	1	1
3	Target Not Detected	HAN	0	HAN	28: FU W12	0	SOF/ RBV	24	1	1
3	6.48e+005 IU/ml	HAN	690000	HAN	00: Baseline	0	SOF/ RBV	24	0	0
3	1.56e+001 IU/ml	HAN	7.5	HAN	02: Week 2	0	SOF/ RBV	24	0	0
3	Target Not Detected	HAN	0	HAN	04: Week 4	0	SOF/ RBV	24	0	0
3	Target Not Detected	HAN	0	HAN	08: Week 8	0	SOF/ RBV	24	0	0
3	Target Not Detected	HAN	0	HAN	12: Week 12	0	SOF/ RBV	24	0	0
3	Target Not Detected	HAN	0	HAN	16: Week 16	0	SOF/ RBV	24	0	0
3	Target Not Detected	HAN	0	HAN	20: Week 20	0	SOF/ RBV	24	0	0
3	Target Not Detected	HAN	0	HAN	24: Week 24	0	SOF/ RBV	24	0	0
3	Target Not Detected	HAN	0	HAN	26: FU W4	0	SOF/ RBV	24	0	0
3	Target Not Detected	HAN	0	HAN	28: FU W12	0	SOF/ RBV	24	0	0
3	1.44e+006 IU/ml	HAN	2100000	HAN	00: Baseline	0	SOF/ RBV	24	1	0
3	3.79e+001 IU/ml	HAN	42	HAN	01: Week 1	0	SOF/ RBV	24	1	0
3	< Titer min	HAN	7.5	HAN	02: Week 2	0	SOF/ RBV	24	1	0
3	< Titer min	HAN	0	HAN	04: Week 4	0	SOF/ RBV	24	1	0
3	Target Not Detected	HAN	0	HAN	08: Week 8	0	SOF/ RBV	24	1	0
3	Target Not Detected	HAN	0	HAN	12: Week 12	0	SOF/ RBV	24	1	0
3	Target Not Detected	HAN	0	HAN	16: Week 16	0	SOF/ RBV	24	1	0
3	Target Not Detected	HAN	0	HAN	20: Week 20	0	SOF/ RBV	24	1	0
3	Target Not Detected	HAN	0	HAN	28: FU W12	0	SOF/ RBV	24	1	0
3	2.77e+006 IU/ml	HAN	3900000	HAN	00: Baseline	0	SOF/ RBV	24	0	0
3	6.09e+001 IU/ml	HAN	140	HAN	01: Week 1	0	SOF/ RBV	24	0	0
3	< Titer min	HAN	7.5	HAN	02: Week 2	0	SOF/ RBV	24	0	0
3	Target Not Detected	HAN	0	HAN	04: Week 4	0	SOF/ RBV	24	0	0
3	Target Not Detected	HAN	0	HAN	08: Week 8	0	SOF/ RBV	24	0	0
3	Target Not Detected	HAN	0	HAN	12: Week 12	0	SOF/ RBV	24	0	0
3	Target Not Detected	HAN	0	HAN	16: Week 16	0	SOF/ RBV	24	0	0
3	Target Not Detected	HAN	0	HAN	20: Week 20	0	SOF/ RBV	24	0	0
3	Target Not Detected	HAN	0	HAN	24: Week 24	0	SOF/ RBV	24	0	0
3	Target Not Detected	HAN	0	HAN	28: FU W12	0	SOF/ RBV	24	0	0
3	4.23e+005 IU/ml	HAN	430000	HAN	00: Baseline	0	SOF/ RBV	24	0	1
3	5.95e+001 IU/ml	HAN	150	HAN	02: Week 2	0	SOF/ RBV	24	0	1
3	2.02e+001 IU/ml	HAN	19	HAN	04: Week 4	0	SOF/ RBV	24	0	1
3	< Titer min	HAN	7.5	HAN	08: Week 8	0	SOF/ RBV	24	0	1
3	Target Not Detected	HAN	7.5	HAN	12: Week 12	0	SOF/ RBV	24	0	1
3	Target Not Detected	HAN	0	HAN	16: Week 16	0	SOF/ RBV	24	0	1
3	Target Not Detected	HAN	0	HAN	20: Week 20	0	SOF/ RBV	24	0	1
3	Target Not Detected	HAN	0	HAN	24: Week 24	0	SOF/ RBV	24	0	1
3	Target Not Detected	HAN	0	HAN	26: FU W4	0	SOF/ RBV	24	0	1
3	Target Not Detected	HAN	0	HAN	28: FU W12	0	SOF/ RBV	24	0	1
1a	5.79e+005 IU/ml	HAN	600000	HAN	00: Baseline	0	SOF / LDV	8	0	1
N/A	5.79e+005 IU/ml	HAN	600000	HAN	00: Baseline	0	SOF / LDV	8	0	1
1a	3.18e+001 IU/ml	HAN	7.5	HAN	02: Week 2	0	SOF / LDV	8	0	1
N/A	8.29e+001 IU/ml	HAN	130	HAN	02: Week 2	0	SOF / LDV	8	0	1
N/A	3.18e+001 IU/ml	HAN	7.5	HAN	02: Week 2	0	SOF / LDV	8	0	1
N/A	< Titer min	HAN	7.5	HAN	04: Week 4	0	SOF / LDV	8	0	1
1a	Target Not Detected	HAN	0	HAN	08: Week 8	0	SOF / LDV	8	0	1
N/A	Target Not Detected	HAN	0	HAN	08: Week 8	0	SOF / LDV	8	0	1
N/A	Target Not Detected	HAN	0	HAN	12: Week 12	0	SOF / LDV	8	0	1
N/A	Target Not Detected	HAN	0	HAN	16: Week 16	0	SOF / LDV	8	0	1
N/A	Target Not Detected	HAN	0	HAN	20: Week 20	0	SOF / LDV	8	0	1
N/A	Target Not Detected	HAN	0	HAN	24: Week 24	0	SOF / LDV	8	0	1
3	1.00e+007 IU/ml	HAN	9800000	HAN	00: Baseline	1	SOF/ RBV	24	0	1
3	8.29e+001 IU/ml	HAN	130	HAN	02: Week 2	1	SOF/ RBV	24	0	1
3	< Titer min	HAN	7.5	HAN	04: Week 4	1	SOF/ RBV	24	0	1
3	Target Not Detected	HAN	0	HAN	08: Week 8	1	SOF/ RBV	24	0	1
3	Target Not Detected	HAN	0	HAN	12: Week 12	1	SOF/ RBV	24	0	1
3	Target Not Detected	HAN	0	HAN	16: Week 16	1	SOF/ RBV	24	0	1
3	Target Not Detected	HAN	0	HAN	20: Week 20	1	SOF/ RBV	24	0	1
3	Target Not Detected	HAN	0	HAN	24: Week 24	1	SOF/ RBV	24	0	1
3	9.45e+003 IU/ml	HAN	11000	HAN	28: FU W12	1	SOF/ RBV	24	0	1
1a	1.33e+006 IU/ml	HAN	1200000	HAN	00: Baseline	0	SOF / LDV	8	0	1
1a	Target Not Detected	HAN	0	HAN	02: Week 2	0	SOF / LDV	8	0	1
1a	Target Not Detected	HAN	0	HAN	04: Week 4	0	SOF / LDV	8	0	1
1a	Target Not Detected	HAN	0	HAN	08: Week 8	0	SOF / LDV	8	0	1
1b	3.01e+006 IU/ml	HAN	2200000	HAN	00: Baseline	0	SOF / LDV	8	0	1
1b	3.76e+001 IU/ml	HAN	45	HAN	02: Week 2	0	SOF / LDV	8	0	1
1b	Target Not Detected	HAN	0	HAN	08: Week 8	0	SOF / LDV	8	0	1
3	1.52e+006 IU/ml	HAN	1300000	HAN	00: Baseline	1	SOF/ RBV	24	1	0
3	2.84e+002 IU/ml	HAN	490	HAN	01: Week 1	1	SOF/ RBV	24	1	0
3	2.96e+001 IU/ml	HAN	59	HAN	02: Week 2	1	SOF/ RBV	24	1	0
3	< Titer min	HAN	7.5	HAN	04: Week 4	1	SOF/ RBV	24	1	0
3	< Titer min	HAN	0	HAN	08: Week 8	1	SOF/ RBV	24	1	0
3	Target Not Detected	HAN	0	HAN	12: Week 12	1	SOF/ RBV	24	1	0
3	Target Not Detected	HAN	0	HAN	16: Week 16	1	SOF/ RBV	24	1	0
3	Target Not Detected	HAN	0	HAN	20: Week 20	1	SOF/ RBV	24	1	0
3	Target Not Detected	HAN	0	HAN	24: Week 24	1	SOF/ RBV	24	1	0
3	2.18e+004 IU/ml	HAN	18000	HAN	28: FU W12	1	SOF/ RBV	24	1	0
